# Supplementary material for: Neighboring Nitrogen Atom-Induced Reactions of Azidoacetyl Hydrazides, including Unexpected Nitrogen-Nitrogen Bond Cleavage of the Hydrazide
Source: MDPI journal article supplement (doi:10.3390/org3040035), 2022-12-19
Supplement: s1 [file s1]

**Supporting Information of**

**Neighboring Nitrogen Atom-Induced Reactions of Azidoacetyl  
Hydrazides, Including Unexpected Nitrogen-Nitrogen Bond  
Cleavage of the Hydrazide**

Hiroki Tanimoto,\* Ryo Adachi, Aoi Otsuki, and Takenori Tomohiro

Faculty of Pharmaceutical Sciences, University of Toyama

E-mail: [tanimoto@pha.u-toyama.ac.jp](mailto:tanimoto@pha.u-toyama.ac.jp)

**Table of Contents**

[1]  $^1\text{H}$  and  $^{13}\text{C}$  NMR Spectra

S001

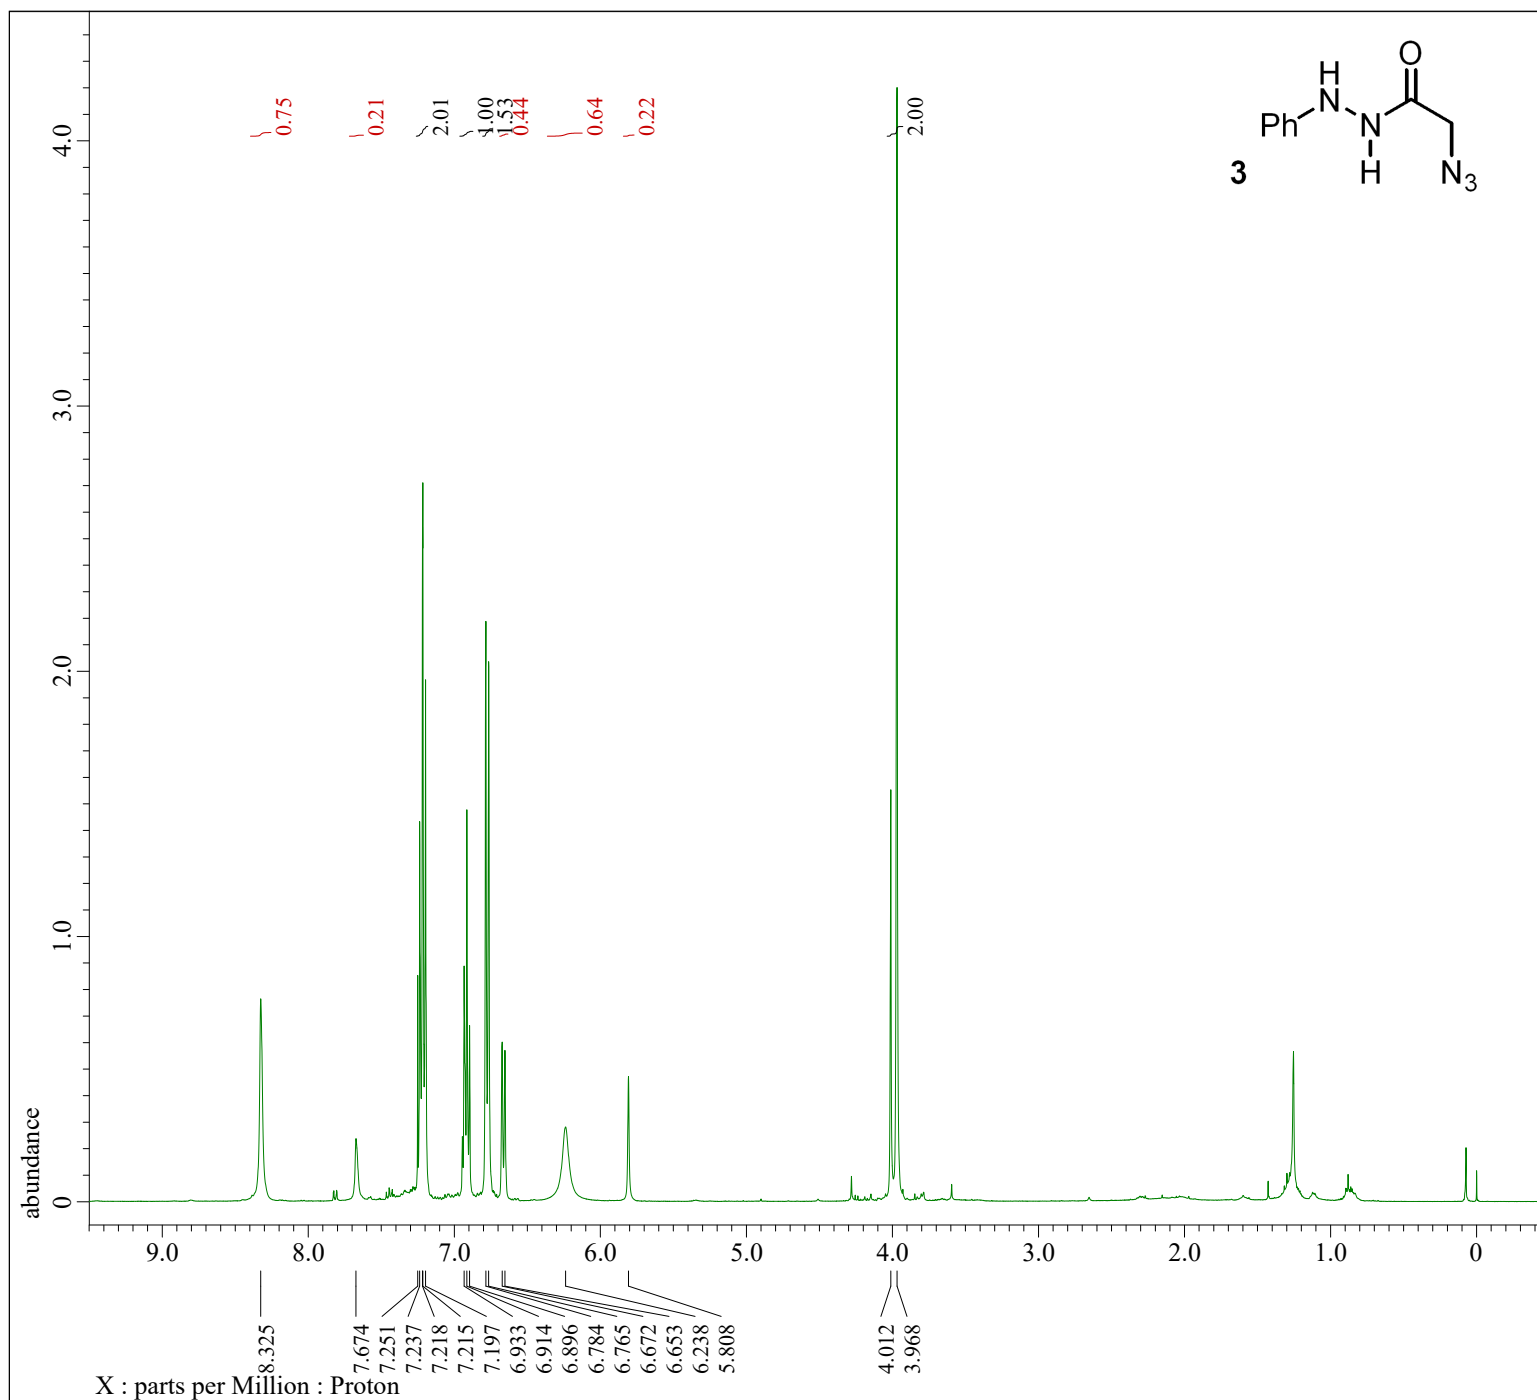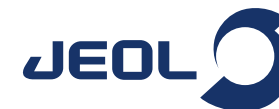

Filename = \_RA-1-66-lproton3-1-8.jdf  
 Author = delta  
 Experiment = proton.jxp  
 Sample\_Id = S#454527  
 Solvent = CHLOROFORM-D  
 Actual\_Start\_Time = 21-SEP-2021 12:38:05  
 Revision\_Time = 5-JUL-2022 14:41:00

Comment = single\_pulse  
 Data\_Format = 1D\_COMPLEX  
 Dim\_Size = 13107  
 X\_Domain = Proton  
 Dim\_Title = Proton  
 Dim\_Units = [ppm]  
 Dimensions = X  
 Site = ECX 400P  
 Spectrometer = DELTA2\_NMR

Field\_Strength = 9.389766[T] (400[MHz])  
 X\_Acq\_Duration = 2.18365952[s]  
 X\_Domain = 1H  
 X\_Freq = 399.78219838[MHz]  
 X\_Offset = 5[ppm]  
 X\_Points = 16384  
 X\_Prescans = 1  
 X\_Resolution = 0.45794685[Hz]  
 X\_Sweep = 7.5030012[kHz]  
 X\_Sweep\_Clippped = 6.00240096[kHz]  
 Irr\_Domain = Proton  
 Irr\_Freq = 399.78219838[MHz]  
 Irr\_Offset = 5[ppm]  
 Tri\_Domain = Proton  
 Tri\_Freq = 399.78219838[MHz]  
 Tri\_Offset = 5[ppm]  
 Clipped = FALSE  
 Scans = 8  
 Total\_Scans = 8

Relaxation\_Delay = 5[s]  
 Recvr\_Gain = 30  
 Temp\_Get = 22.9[dC]  
 X\_90\_Width = 11.5[us]  
 X\_Acq\_Time = 2.18365952[s]  
 X\_Angle = 45[deg]  
 X\_Atn = 1[dB]  
 X\_Pulse = 5.75[us]  
 Irr\_Mode = Off  
 Tri\_Mode = Off  
 Dante\_Presat = FALSE  
 Initial\_Wait = 1[s]  
 Repetition\_Time = 7.18365952[s]

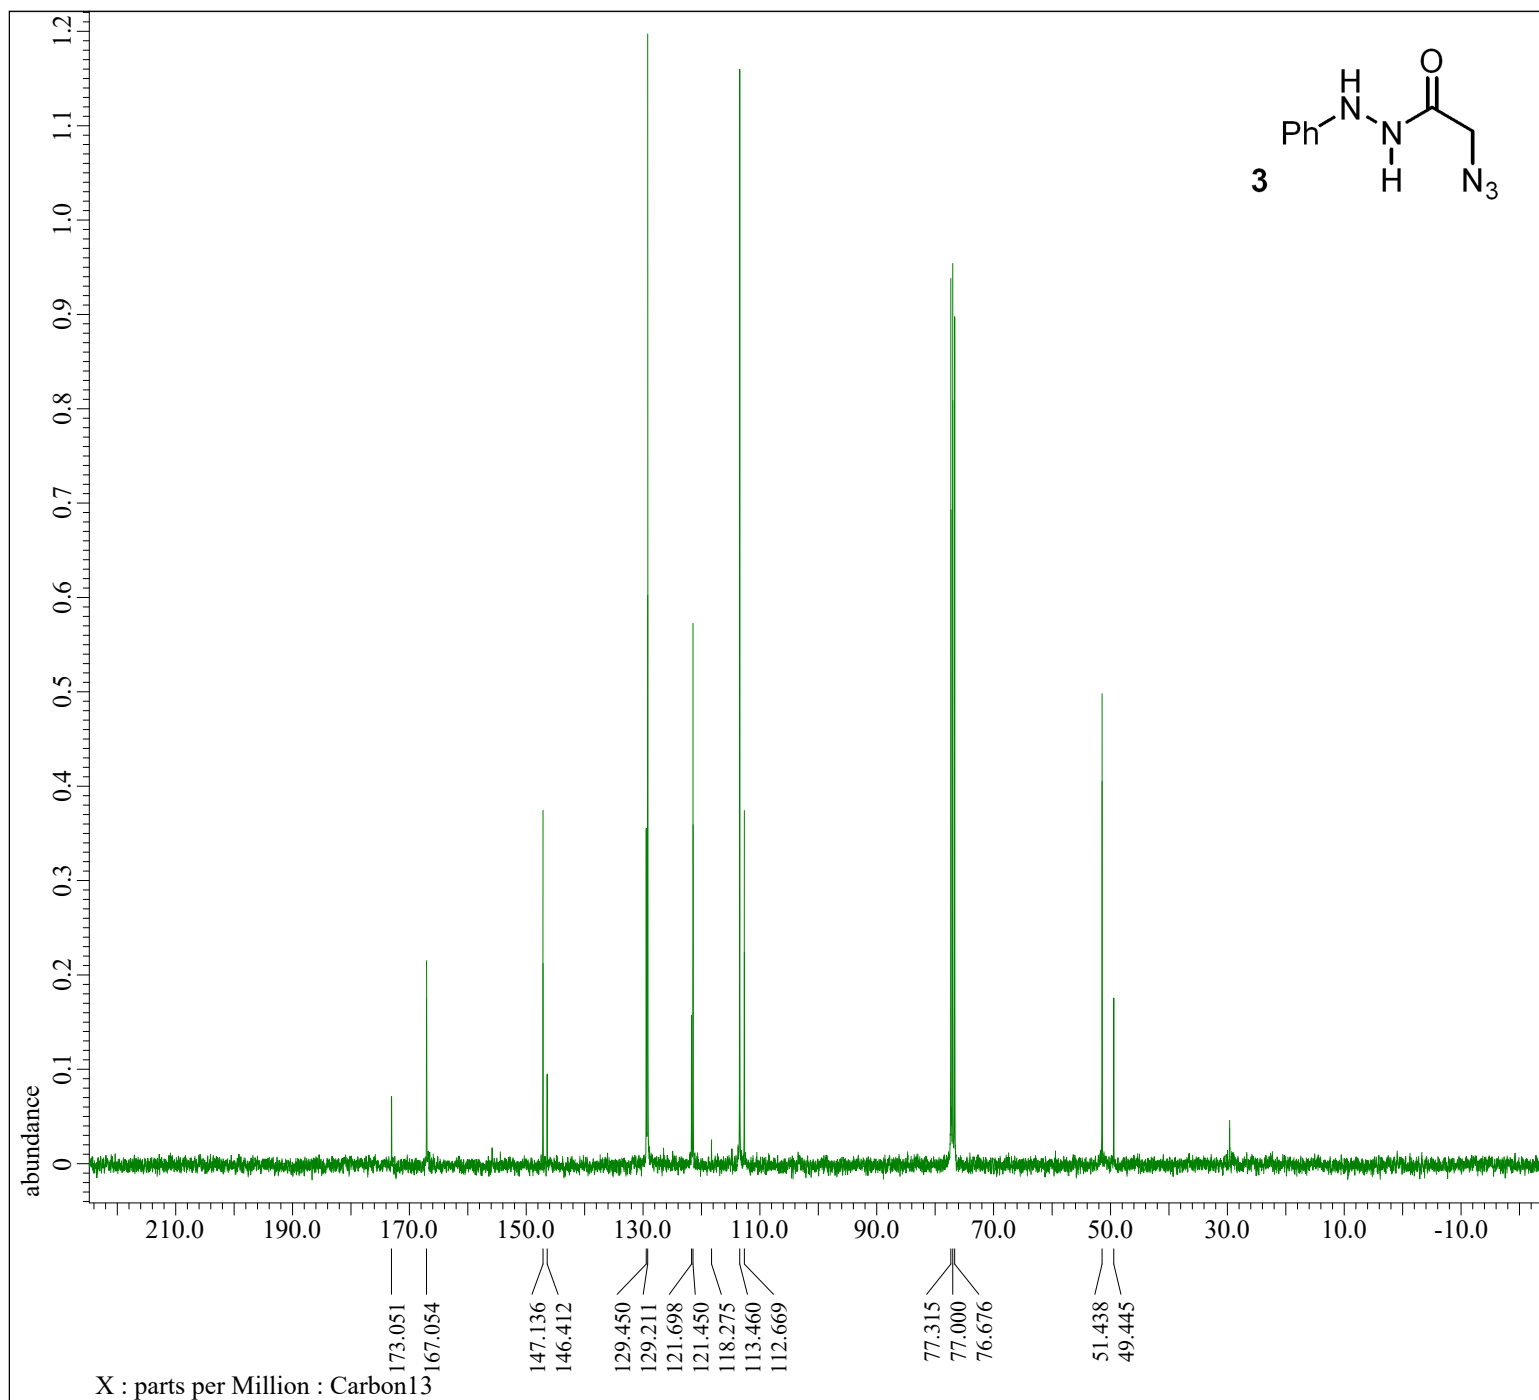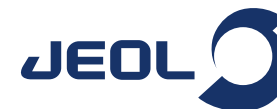

Filename = \_RA-1-66-1carbon3-1-8.jdf  
 Author = delta  
 Experiment = carbon.jxp  
 Sample\_Id = S#580417  
 Solvent = CHLOROFORM-D  
 Actual\_Start\_Time = 21-SEP-2021 16:07:47  
 Revision\_Time = 2-MAR-2022 15:07:38

Comment = single pulse decoupled ga  
 Data\_Format = 1D\_COMPLEX  
 Dim\_Size = 26214  
 X\_Domain = Carbon  
 Dim\_Title = Carbon13  
 Dim\_Units = [ppm]  
 Dimensions = X  
 Site = ECX 400P  
 Spectrometer = DELTA2\_NMR

Field\_Strength = 9.389766[T] (400[MHz])  
 X\_Acq\_Duration = 1.0433312[s]  
 X\_Domain = 13C  
 X\_Freq = 100.52530333[MHz]  
 X\_Offset = 100[ppm]  
 X\_Points = 32768  
 X\_Prescans = 4  
 X\_Resolution = 0.95846665[Hz]  
 X\_Sweep = 31.40703518[kHz]  
 X\_Sweep\_Clippped = 25.12562814[kHz]  
 Irr\_Domain = Proton  
 Irr\_Freq = 399.78219838[MHz]  
 Irr\_Offset = 5[ppm]  
 Clipped = TRUE  
 Scans = 376  
 Total\_Scans = 376

Relaxation\_Delay = 2[s]  
 Recvr\_Gain = 58  
 Temp\_Get = 23.5[dC]  
 X\_90\_Width = 11[us]  
 X\_Acq\_Time = 1.0433312[s]  
 X\_Angle = 30[deg]  
 X\_Atn = 4[dB]  
 X\_Pulse = 3.66666667[us]  
 Irr\_Atn\_Dec = 21[dB]  
 Irr\_Atn\_Noe = 21[dB]  
 Irr\_Noise = WALTZ  
 Irr\_Pwidth = 0.115[ms]  
 Decoupling = TRUE  
 Initial\_Wait = 1[s]  
 Noe = TRUE  
 Noe\_Time = 2[s]  
 Repetition\_Time = 3.0433312[s]

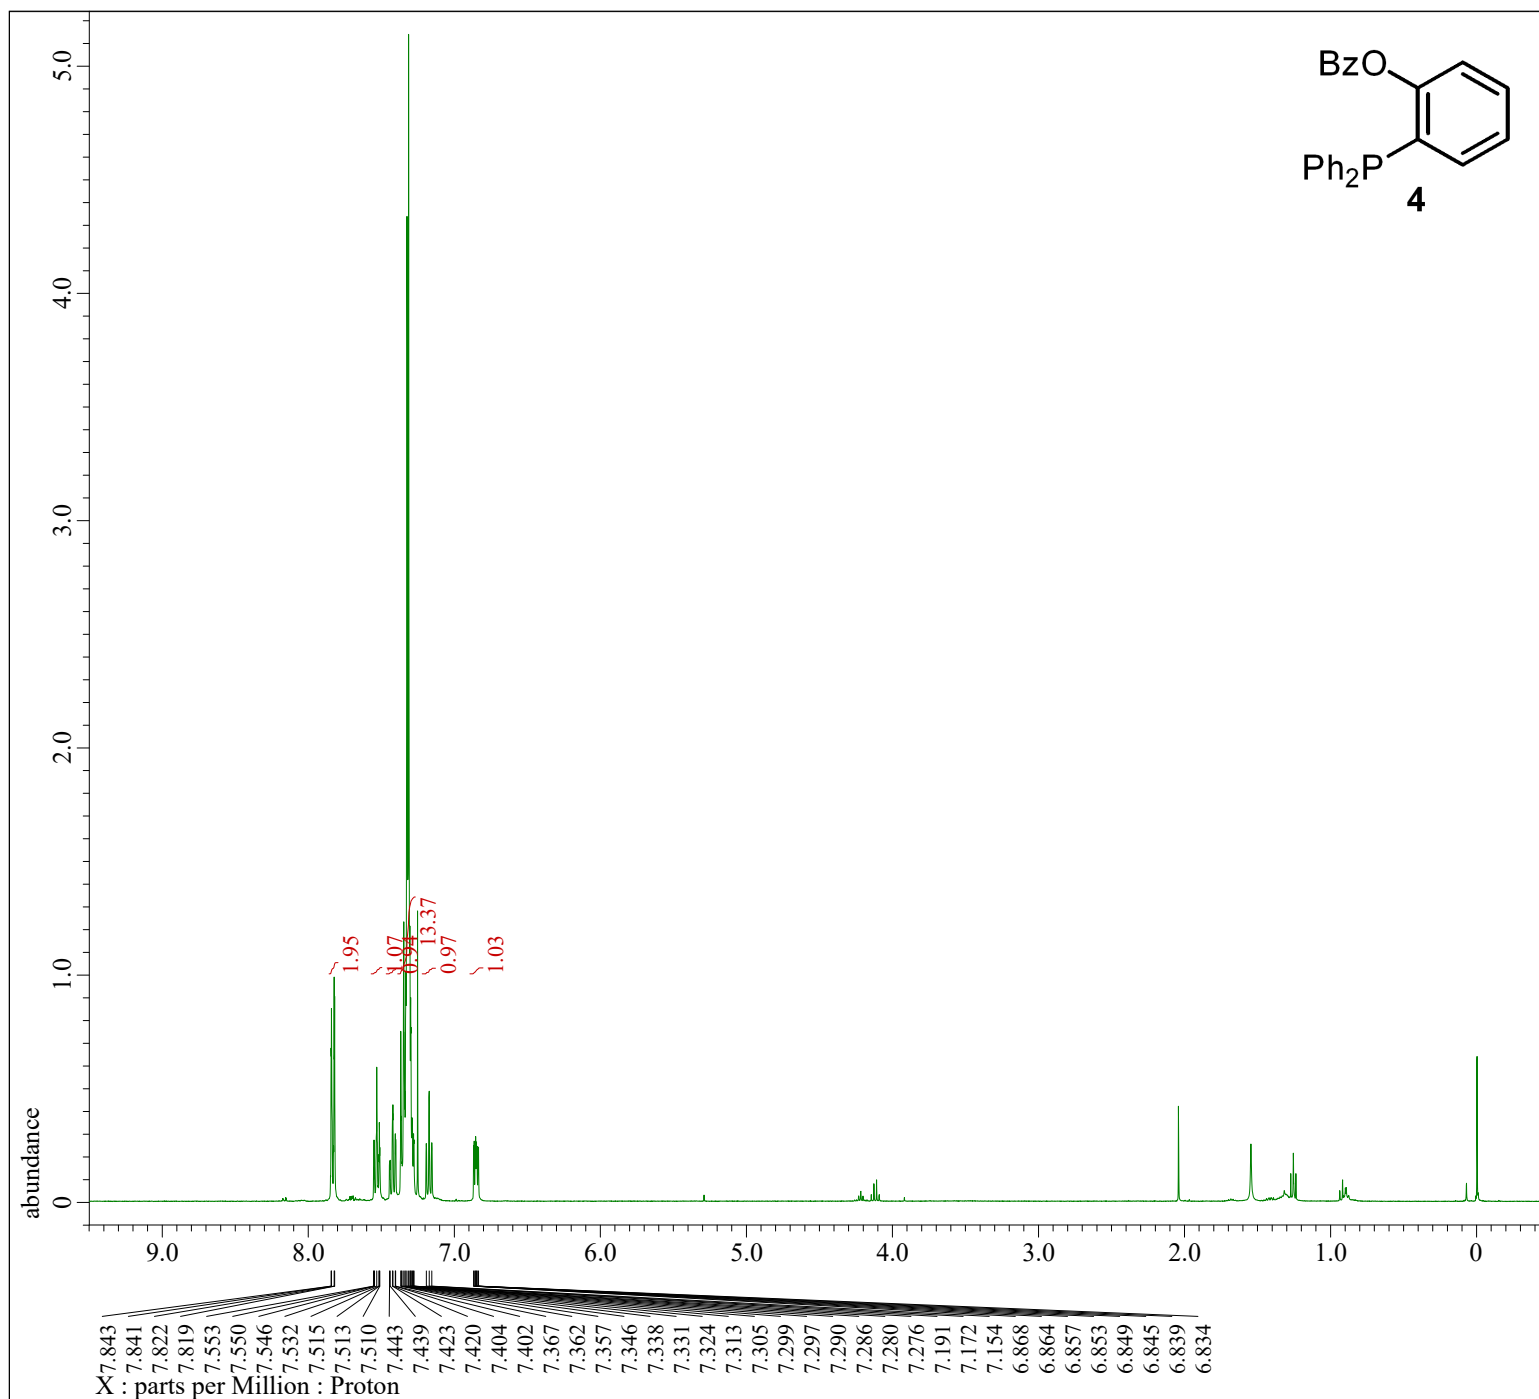

Filename = \_RA1-14-1proton-1-30.jdf  
 Author = delta  
 Experiment = proton.jxp  
 Sample\_Id = S#475643  
 Solvent = CHLOROFORM-D  
 Actual\_Start\_Time = 16-MAR-2021 13:13:31  
 Revision\_Time = 16-SEP-2022 18:30:57

Comment = single\_pulse  
 Data\_Format = 1D\_COMPLEX  
 Dim\_Size = 13107  
 X\_Domain = Proton  
 Dim\_Title = Proton  
 Dim\_Units = [ppm]  
 Dimensions = X  
 Site = ECX 400P  
 Spectrometer = DELTA2\_NMR

Field\_Strength = 9.389766[T] (400[MHz])  
 X\_Acq\_Duration = 2.18365952[s]  
 X\_Domain = 1H  
 X\_Freq = 399.78219838[MHz]  
 X\_Offset = 5[ppm]  
 X\_Points = 16384  
 X\_Prescans = 1  
 X\_Resolution = 0.45794685[Hz]  
 X\_Sweep = 7.5030012[kHz]  
 X\_Sweep\_Clippped = 6.00240096[kHz]  
 Irr\_Domain = Proton  
 Irr\_Freq = 399.78219838[MHz]  
 Irr\_Offset = 5[ppm]  
 Tri\_Domain = Proton  
 Tri\_Freq = 399.78219838[MHz]  
 Tri\_Offset = 5[ppm]  
 Clipped = FALSE  
 Scans = 8  
 Total\_Scans = 8

Relaxation\_Delay = 5[s]  
 Recvr\_Gain = 36  
 Temp\_Get = 22.8[dC]  
 X\_90\_Width = 11.1[us]  
 X\_Acq\_Time = 2.18365952[s]  
 X\_Angle = 45[deg]  
 X\_Atn = 0.4[dB]  
 X\_Pulse = 5.55[us]  
 Irr\_Mode = Off  
 Tri\_Mode = Off  
 Dante\_Presat = FALSE  
 Initial\_Wait = 1[s]  
 Repetition\_Time = 7.18365952[s]

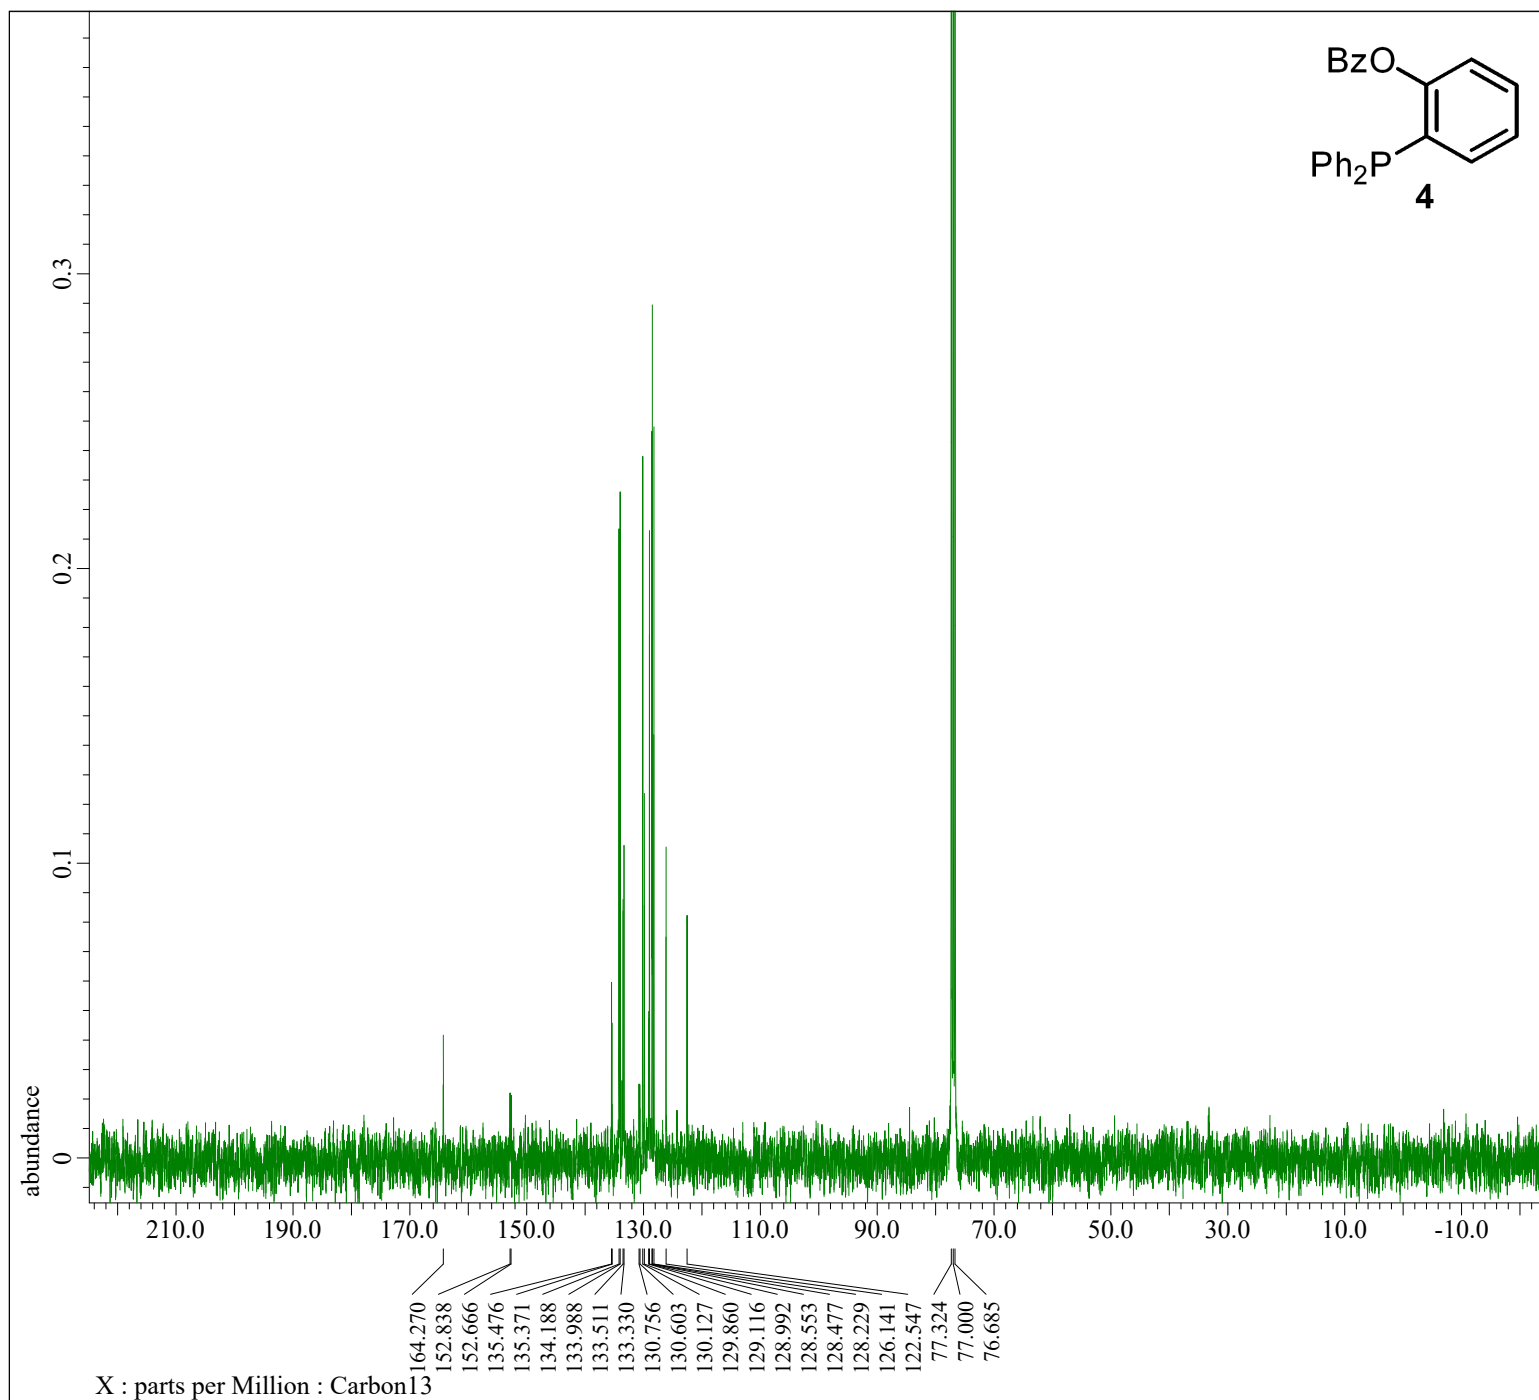

Filename = \_RA-1-43-2carbon-1-4.jdf  
 Author = delta  
 Experiment = carbon.jxp  
 Sample\_Id = S#494059  
 Solvent = CHLOROFORM-D  
 Actual\_Start\_Time = 5-SEP-2022 13:43:52  
 Revision\_Time = 5-SEP-2022 16:22:39

Comment = single pulse decoupled ga  
 Data\_Format = 1D\_COMPLEX  
 Dim\_Size = 26214  
 X\_Domain = Carbon  
 Dim\_Title = Carbon13  
 Dim\_Units = [ppm]  
 Dimensions = X  
 Site = ECX 400P  
 Spectrometer = DELTA2\_NMR

Field\_Strength = 9.389766[T] (400[MHz])  
 X\_Acq\_Duration = 1.04333312[s]  
 X\_Domain = 13C  
 X\_Freq = 100.52530333[MHz]  
 X\_Offset = 100[ppm]  
 X\_Points = 32768  
 X\_Prescans = 4  
 X\_Resolution = 0.95846665[Hz]  
 X\_Sweep = 31.40703518[kHz]  
 X\_Sweep\_Clippped = 25.12562814[kHz]  
 Irr\_Domain = Proton  
 Irr\_Freq = 399.78219838[MHz]  
 Irr\_Offset = 5[ppm]  
 Clipped = FALSE  
 Scans = 290  
 Total\_Scans = 290

Relaxation\_Delay = 2[s]  
 Recvr\_Gain = 58  
 Temp\_Get = 23.3[dC]  
 X\_90\_Width = 11[us]  
 X\_Acq\_Time = 1.04333312[s]  
 X\_Angle = 30[deg]  
 X\_Atn = 4[dB]  
 X\_Pulse = 3.66666667[us]  
 Irr\_Atn\_Dec = 21[dB]  
 Irr\_Atn\_Noe = 21[dB]  
 Irr\_Noise = WALTZ  
 Irr\_Pwidth = 0.115[ms]  
 Decoupling = TRUE  
 Initial\_Wait = 1[s]  
 Noe = TRUE  
 Noe\_Time = 2[s]  
 Repetition\_Time = 3.04333312[s]

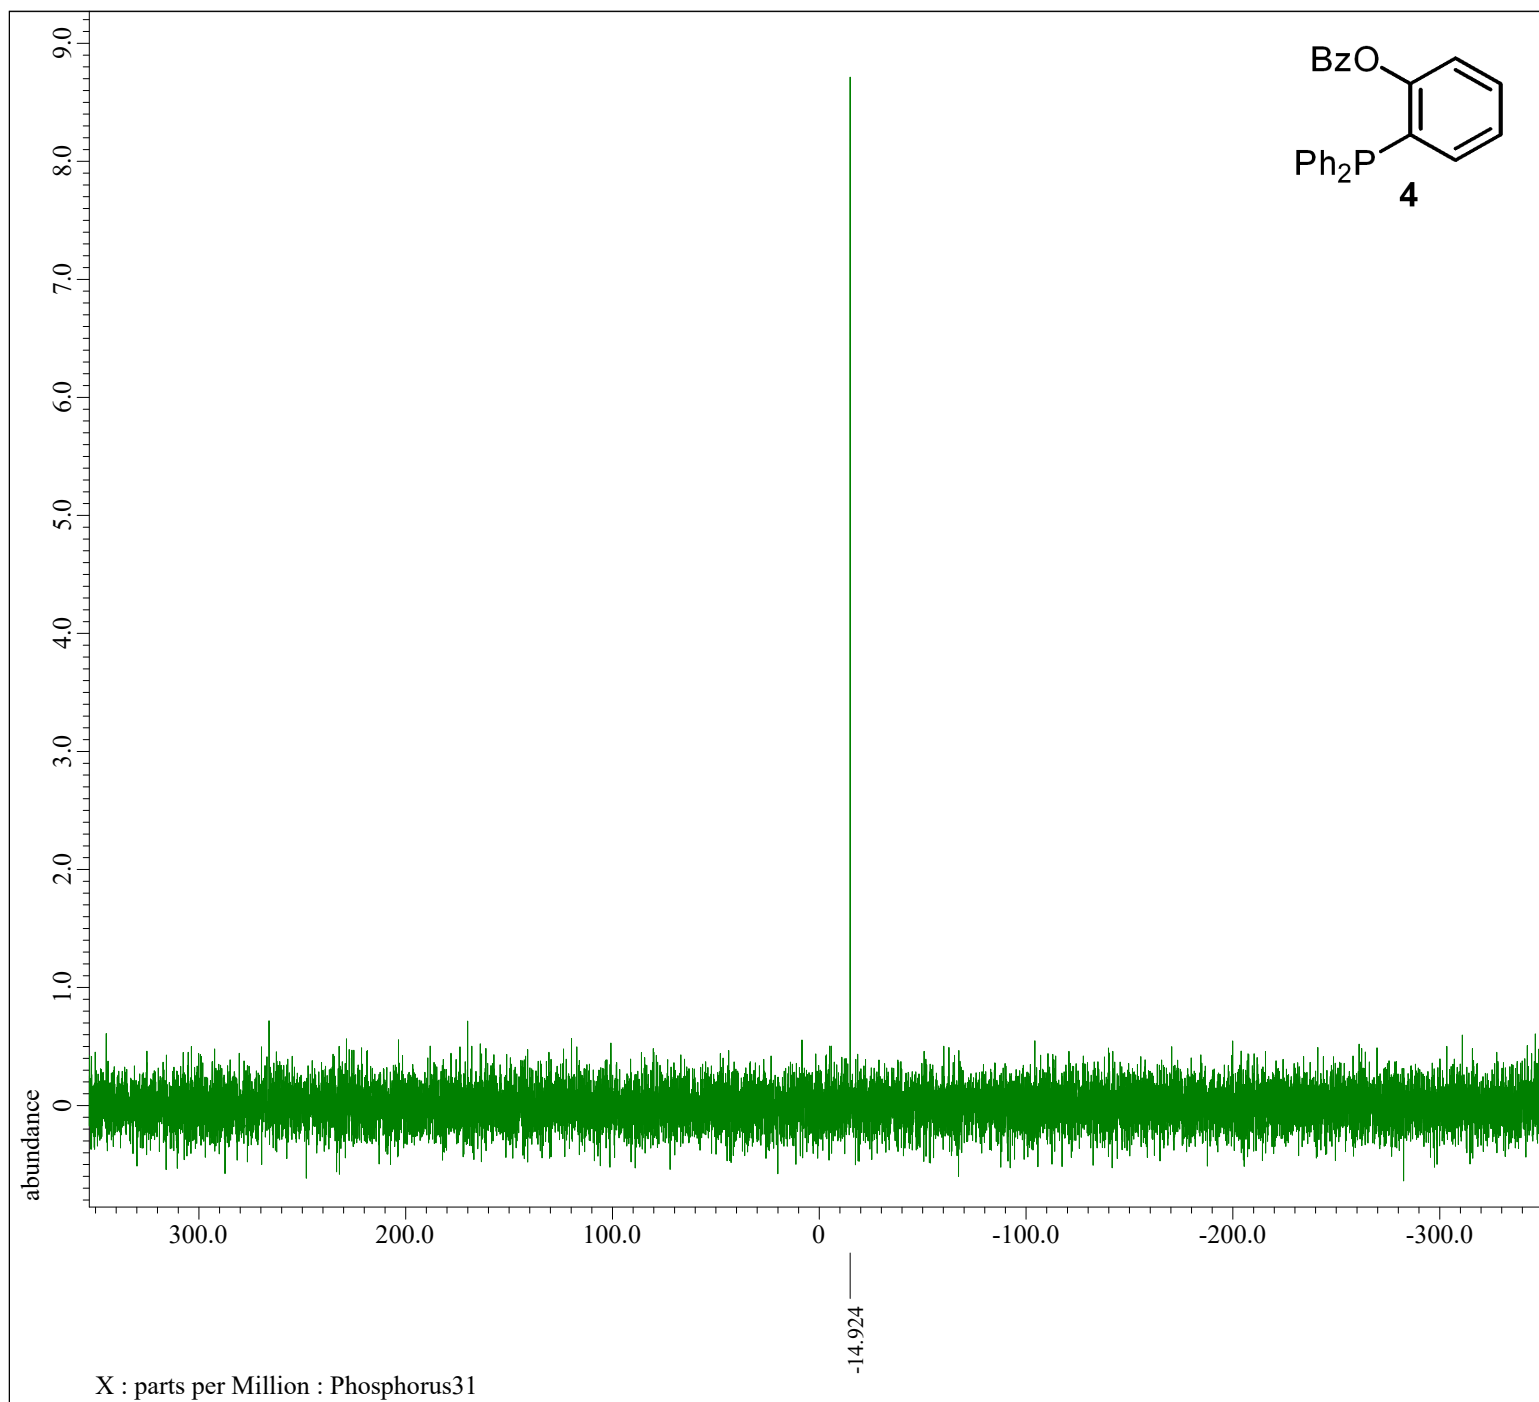

Filename = \_RA-1-81-2phosphorus-1-20  
 Author = delta  
 Experiment = single\_pulse.ex2  
 Sample\_Id = S#525721  
 Solvent = CHLOROFORM-D  
 Actual\_Start\_Time = 5-SEP-2022 14:36:36  
 Revision\_Time = 21-SEP-2022 11:04:21

Data\_Format = 1D COMPLEX  
 Dim\_Size = 13107  
 X\_Domain = Phosph  
 Dim\_Title = Phosphorus31  
 Dim\_Units = [ppm]  
 Dimensions = X  
 Site = ECX 400P  
 Spectrometer = DELTA2\_NMR

Field\_Strength = 9.389766[T] (400 [MHz])  
 X\_Acq\_Duration = 0.114688[s]  
 X\_Domain = 31P  
 X\_Freq = 161.83469309 [MHz]  
 X\_Offset = 0 [ppm]  
 X\_Points = 16384  
 X\_Prescans = 1  
 X\_Resolution = 8.71930804 [Hz]  
 X\_Sweep = 142.85714286 [kHz]  
 X\_Sweep\_Clippped = 114.28571429 [kHz]  
 Irr\_Domain = Phosphorus31  
 Irr\_Freq = 161.83469309 [MHz]  
 Irr\_Offset = 5 [ppm]  
 Tri\_Domain = Phosphorus31  
 Tri\_Freq = 161.83469309 [MHz]  
 Tri\_Offset = 5 [ppm]  
 Clipped = FALSE  
 Scans = 8  
 Total\_Scans = 8

Relaxation\_Delay = 5[s]  
 Recvr\_Gain = 56  
 Temp\_Get = 23.2 [dC]  
 X\_90\_Width = 15.2 [us]  
 X\_Acq\_Time = 0.114688[s]  
 X\_Angle = 45 [deg]  
 X\_Atn = 8 [dB]  
 X\_Pulse = 7.6 [us]  
 Irr\_Mode = Off  
 Tri\_Mode = Off  
 Automatic = TRUE  
 Dante\_Presat = FALSE  
 Initial\_Wait = 1[s]  
 Repetition\_Time = 5.114688[s]

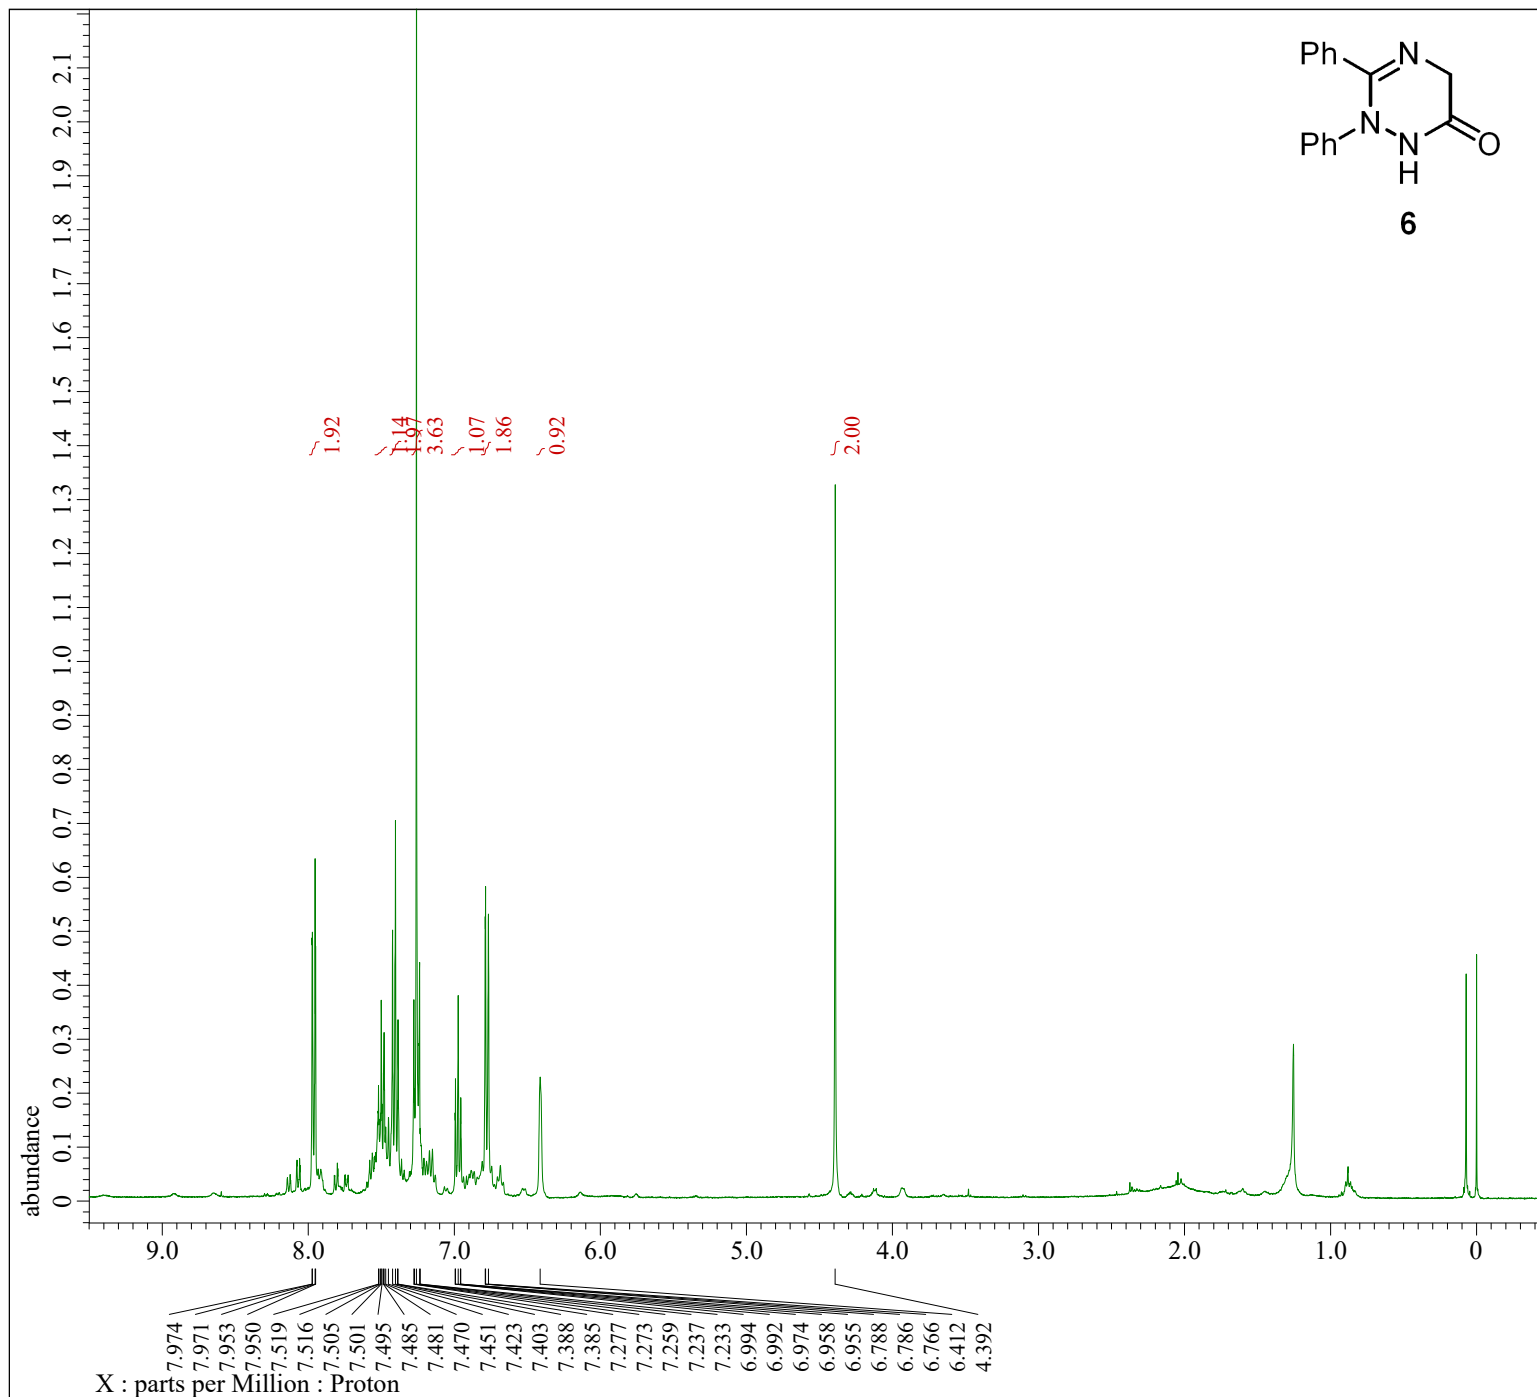

Filename = \_RA-1-97-1-2proton-1-8.jd  
 Author = delta  
 Experiment = proton.jxp  
 Sample\_Id = S#617898  
 Solvent = CHLOROFORM-D  
 Actual\_Start\_Time = 7-DEC-2021 17:10:37  
 Revision\_Time = 5-JUL-2022 14:47:52

Comment = single\_pulse  
 Data\_Format = 1D\_COMPLEX  
 Dim\_Size = 13107  
 X\_Domain = Proton  
 Dim\_Title = Proton  
 Dim\_Units = [ppm]  
 Dimensions = X  
 Site = ECX 400P  
 Spectrometer = DELTA2\_NMR

Field\_Strength = 9.389766[T] (400[MHz])  
 X\_Acq\_Duration = 2.18365952[s]  
 X\_Domain = 1H  
 X\_Freq = 399.78219838[MHz]  
 X\_Offset = 5[ppm]  
 X\_Points = 16384  
 X\_Prescans = 1  
 X\_Resolution = 0.45794685[Hz]  
 X\_Sweep = 7.5030012[kHz]  
 X\_Sweep\_Clippped = 6.00240096[kHz]  
 Irr\_Domain = Proton  
 Irr\_Freq = 399.78219838[MHz]  
 Irr\_Offset = 5[ppm]  
 Tri\_Domain = Proton  
 Tri\_Freq = 399.78219838[MHz]  
 Tri\_Offset = 5[ppm]  
 Clipped = FALSE  
 Scans = 8  
 Total\_Scans = 8

Relaxation\_Delay = 5[s]  
 Recvr\_Gain = 38  
 Temp\_Get = 22.6[dC]  
 X\_90\_Width = 11.5[us]  
 X\_Acq\_Time = 2.18365952[s]  
 X\_Angle = 45[deg]  
 X\_Atn = 1[dB]  
 X\_Pulse = 5.75[us]  
 Irr\_Mode = Off  
 Tri\_Mode = Off  
 Dante\_Presat = FALSE  
 Initial\_Wait = 1[s]  
 Repetition\_Time = 7.18365952[s]

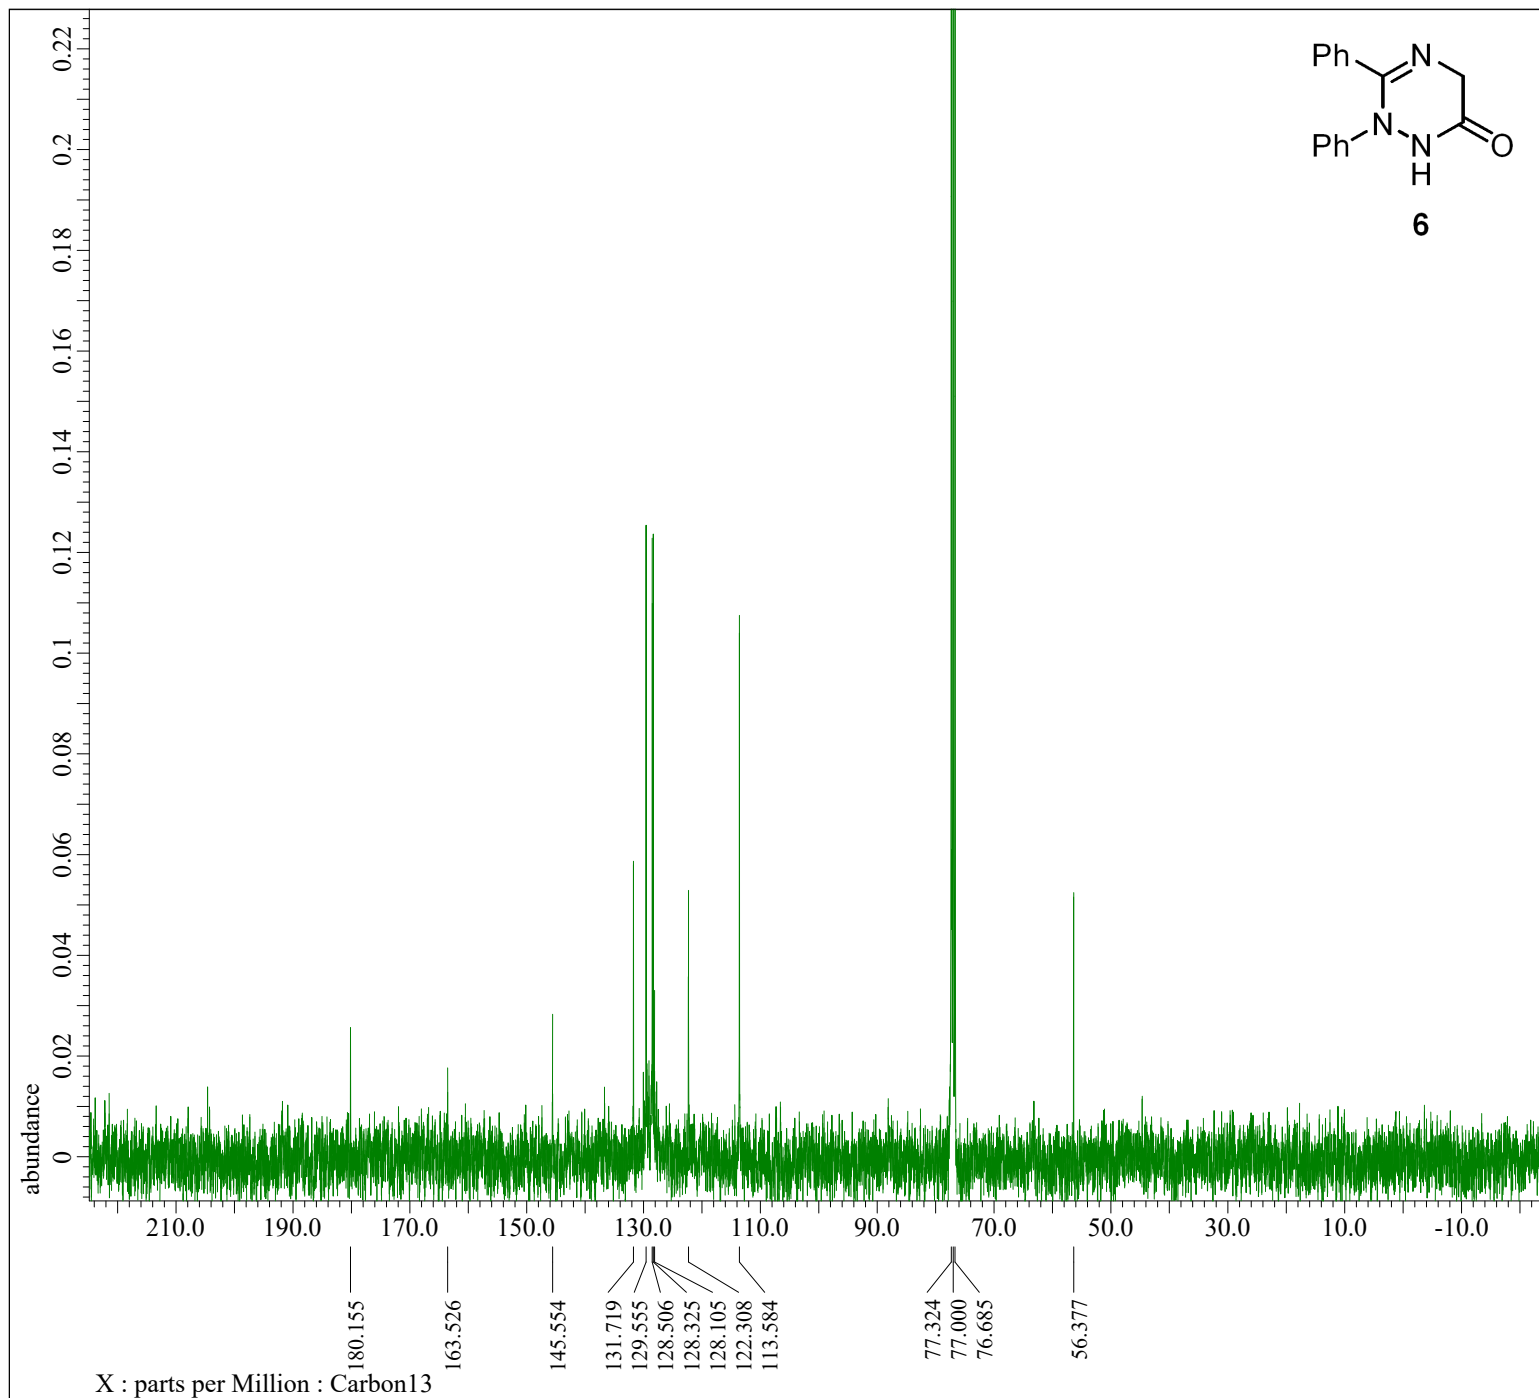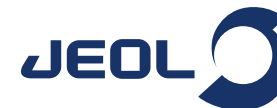

Filename = \_RA-1-97-1-2carbon-1-4.jd  
 Author = delta  
 Experiment = carbon.jxp  
 Sample\_Id = S#620281  
 Solvent = CHLOROFORM-D  
 Actual\_Start\_Time = 7-DEC-2021 17:16:33  
 Revision\_Time = 7-DEC-2021 17:48:55

Comment = single pulse decoupled ga  
 Data\_Format = 1D COMPLEX  
 Dim\_Size = 26214  
 X\_Domain = Carbon  
 Dim\_Title = Carbon13  
 Dim\_Units = [ppm]  
 Dimensions = X  
 Site = ECX 400P  
 Spectrometer = DELTA2\_NMR

Field\_Strength = 9.389766[T] (400[MHz])  
 X\_Acq\_Duration = 1.0433312[s]  
 X\_Domain = 13C  
 X\_Freq = 100.52530333[MHz]  
 X\_Offset = 100[ppm]  
 X\_Points = 32768  
 X\_Prescans = 4  
 X\_Resolution = 0.95846665[Hz]  
 X\_Sweep = 31.40703518[kHz]  
 X\_Sweep\_Clippped = 25.12562814[kHz]  
 Irr\_Domain = Proton  
 Irr\_Freq = 399.78219838[MHz]  
 Irr\_Offset = 5[ppm]  
 Clipped = FALSE  
 Scans = 500  
 Total\_Scans = 500

Relaxation\_Delay = 2[s]  
 Recvr\_Gain = 58  
 Temp\_Get = 22.6[dC]  
 X\_90\_Width = 11[us]  
 X\_Acq\_Time = 1.04333312[s]  
 X\_Angle = 30[deg]  
 X\_Atn = 4[dB]  
 X\_Pulse = 3.66666667[us]  
 Irr\_Atn\_Dec = 21[dB]  
 Irr\_Atn\_Noe = 21[dB]  
 Irr\_Noise = WALTZ  
 Irr\_Pwidth = 0.115[ms]  
 Decoupling = TRUE  
 Initial\_Wait = 1[s]  
 Noe = TRUE  
 Noe\_Time = 2[s]  
 Repetition\_Time = 3.04333312[s]



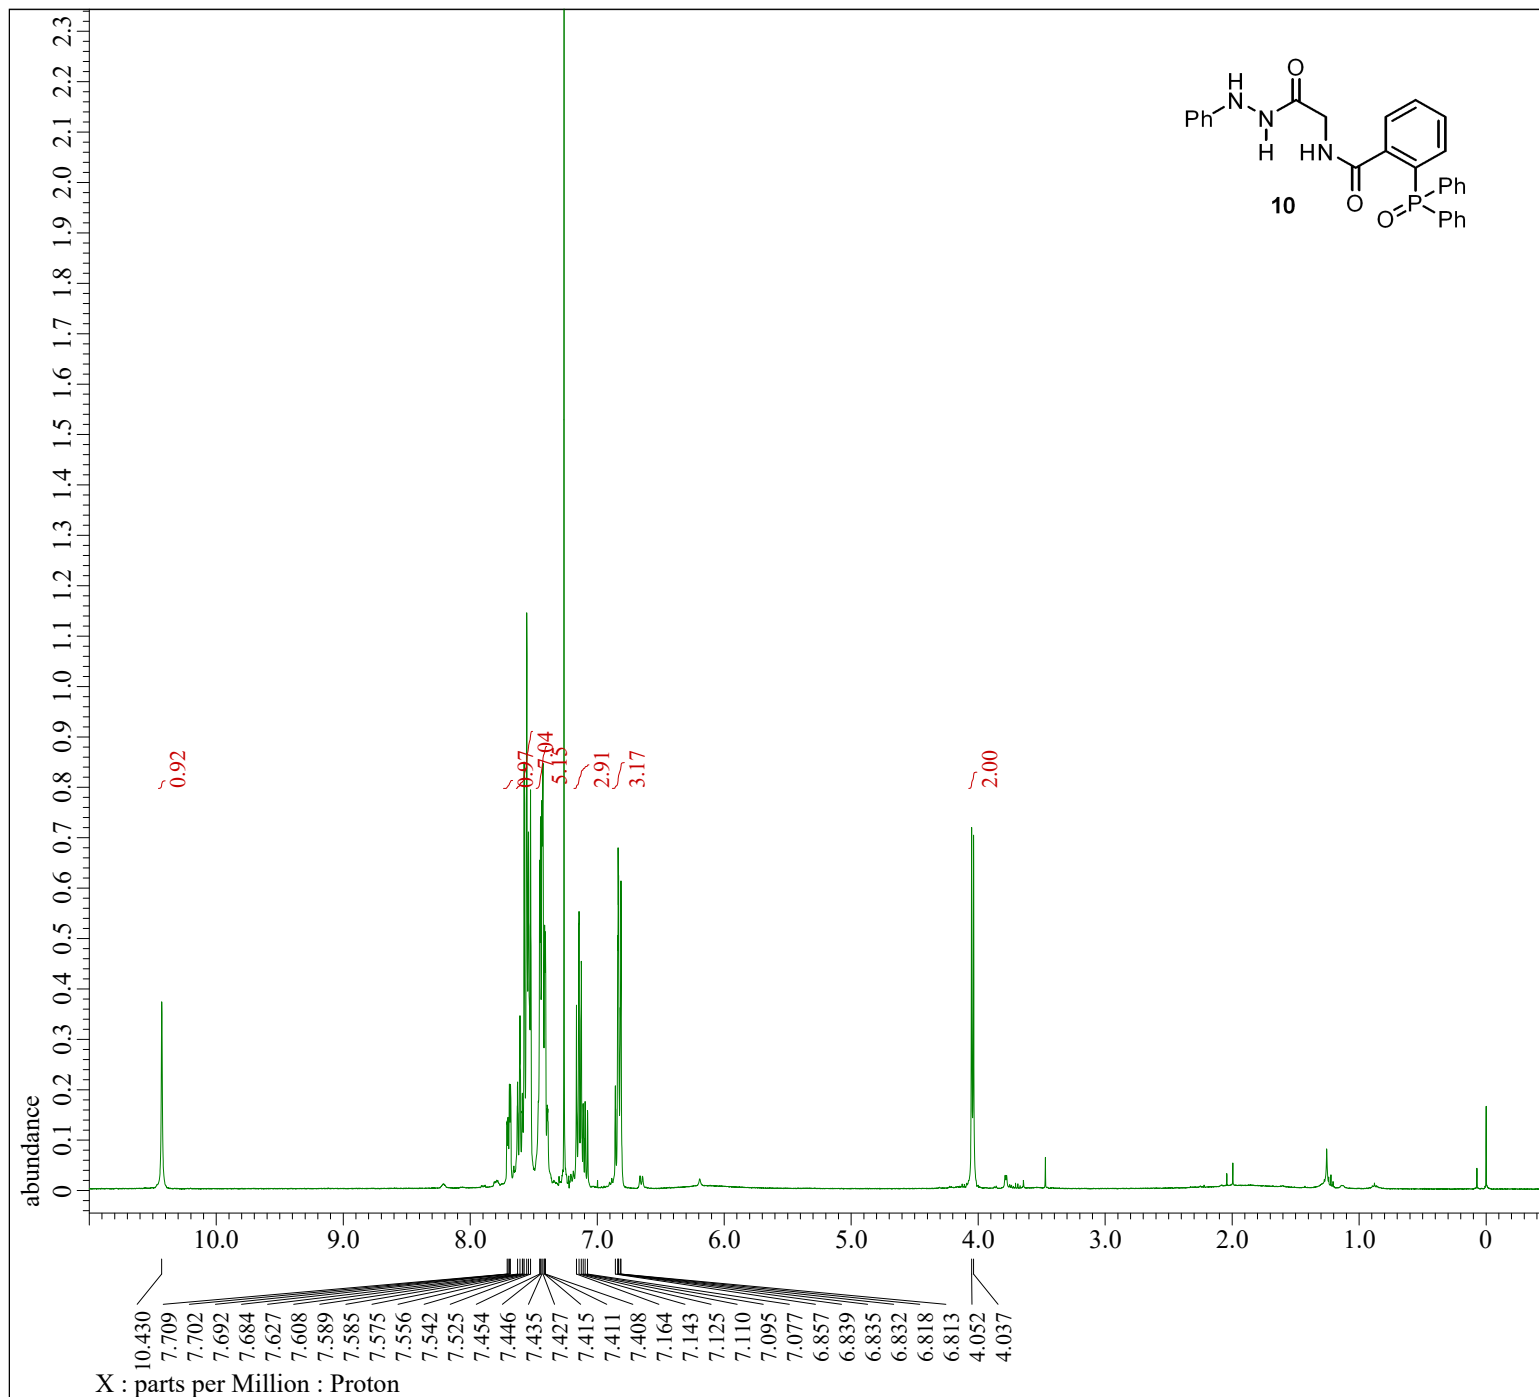

Filename = \_RA-1-87-1-2proton-1-8.jd  
 Author = delta  
 Experiment = proton.jxp  
 Sample\_Id = S#409022  
 Solvent = CHLOROFORM-D  
 Actual\_Start\_Time = 29-OCT-2021 11:22:43  
 Revision\_Time = 5-JUL-2022 14:52:33

Comment = single\_pulse  
 Data\_Format = 1D\_COMPLEX  
 Dim\_Size = 13107  
 X\_Domain = Proton  
 Dim\_Title = Proton  
 Dim\_Units = [ppm]  
 Dimensions = X  
 Site = ECX 400P  
 Spectrometer = DELTA2\_NMR

Field\_Strength = 9.389766[T] (400[MHz])  
 X\_Acq\_Duration = 2.18365952[s]  
 X\_Domain = 1H  
 X\_Freq = 399.78219838[MHz]  
 X\_Offset = 5[ppm]  
 X\_Points = 16384  
 X\_Prescans = 1  
 X\_Resolution = 0.45794685[Hz]  
 X\_Sweep = 7.5030012[kHz]  
 X\_Sweep\_Clippped = 6.00240096[kHz]  
 Irr\_Domain = Proton  
 Irr\_Freq = 399.78219838[MHz]  
 Irr\_Offset = 5[ppm]  
 Tri\_Domain = Proton  
 Tri\_Freq = 399.78219838[MHz]  
 Tri\_Offset = 5[ppm]  
 Clipped = FALSE  
 Scans = 8  
 Total\_Scans = 8

Relaxation\_Delay = 5[s]  
 Recvr\_Gain = 36  
 Temp\_Get = 22.7[dC]  
 X\_90\_Width = 11.5[us]  
 X\_Acq\_Time = 2.18365952[s]  
 X\_Angle = 45[deg]  
 X\_Atn = 1[dB]  
 X\_Pulse = 5.75[us]  
 Irr\_Mode = Off  
 Tri\_Mode = Off  
 Dante\_Presat = FALSE  
 Initial\_Wait = 1[s]  
 Repetition\_Time = 7.18365952[s]

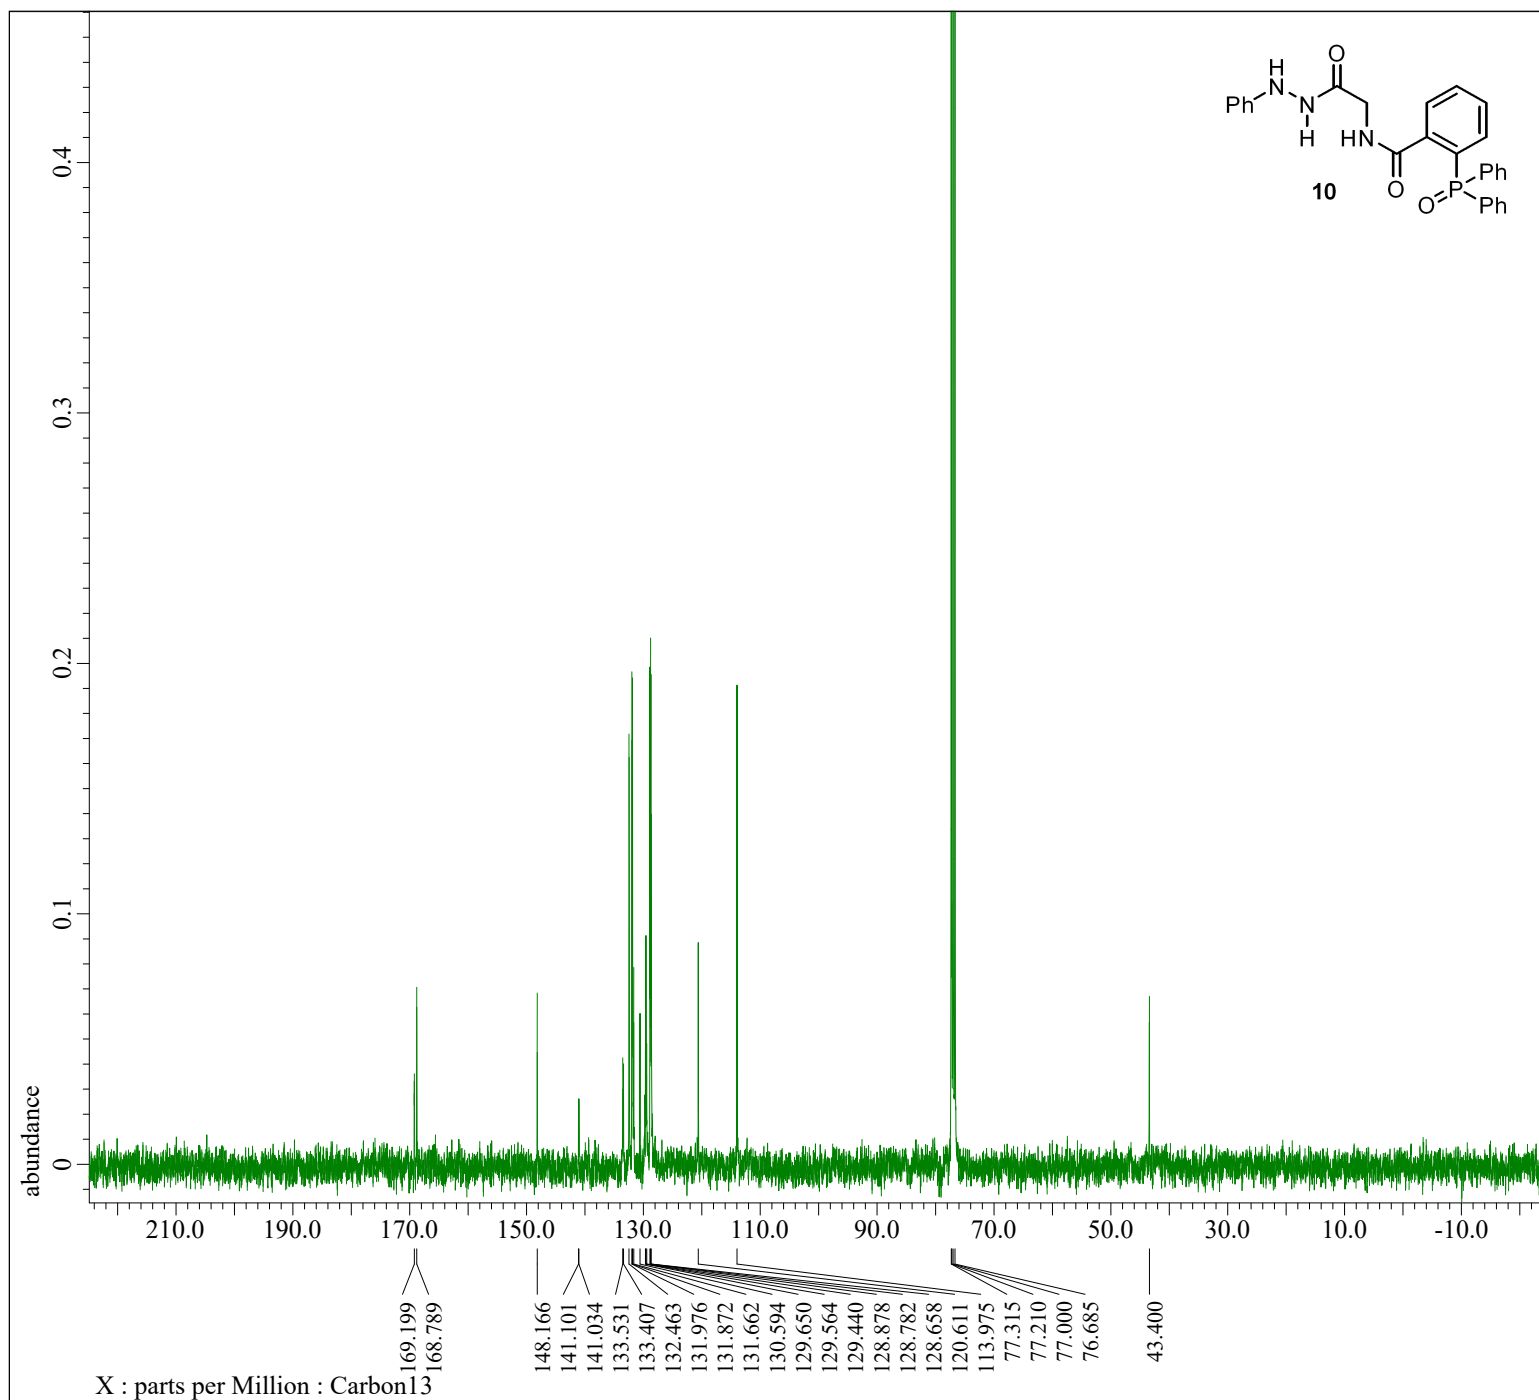

Filename = \_RA-1-87-1carbon-1-4.jdf  
 Author = delta  
 Experiment = carbon.jxp  
 Sample\_Id = S#499292  
 Solvent = CHLOROFORM-D  
 Actual\_Start\_Time = 29-OCT-2021 13:52:34  
 Revision\_Time = 9-FEB-2022 12:42:26

Comment = single pulse decoupled ga  
 Data\_Format = 1D\_COMPLEX  
 Dim\_Size = 26214  
 X\_Domain = Carbon  
 Dim\_Title = Carbon13  
 Dim\_Units = [ppm]  
 Dimensions = X  
 Site = ECX 400P  
 Spectrometer = DELTA2\_NMR

Field\_Strength = 9.389766[T] (400[MHz])  
 X\_Acq\_Duration = 1.04333312[s]  
 X\_Domain = 13C  
 X\_Freq = 100.52530333[MHz]  
 X\_Offset = 100[ppm]  
 X\_Points = 32768  
 X\_Prescans = 4  
 X\_Resolution = 0.95846665[Hz]  
 X\_Sweep = 31.40703518[kHz]  
 X\_Sweep\_Clippped = 25.12562814[kHz]  
 Irr\_Domain = Proton  
 Irr\_Freq = 399.78219838[MHz]  
 Irr\_Offset = 5[ppm]  
 Clipped = FALSE  
 Scans = 512  
 Total\_Scans = 512

Relaxation\_Delay = 2[s]  
 Recvr\_Gain = 58  
 Temp\_Get = 22.8[dC]  
 X\_90\_Width = 11[us]  
 X\_Acq\_Time = 1.04333312[s]  
 X\_Angle = 30[deg]  
 X\_Atn = 4[dB]  
 X\_Pulse = 3.66666667[us]  
 Irr\_Atn\_Dec = 21[dB]  
 Irr\_Atn\_Noe = 21[dB]  
 Irr\_Noise = WALTZ  
 Irr\_Pwidth = 0.115[ms]  
 Decoupling = TRUE  
 Initial\_Wait = 1[s]  
 Noe = TRUE  
 Noe\_Time = 2[s]  
 Repetition\_Time = 3.04333312[s]

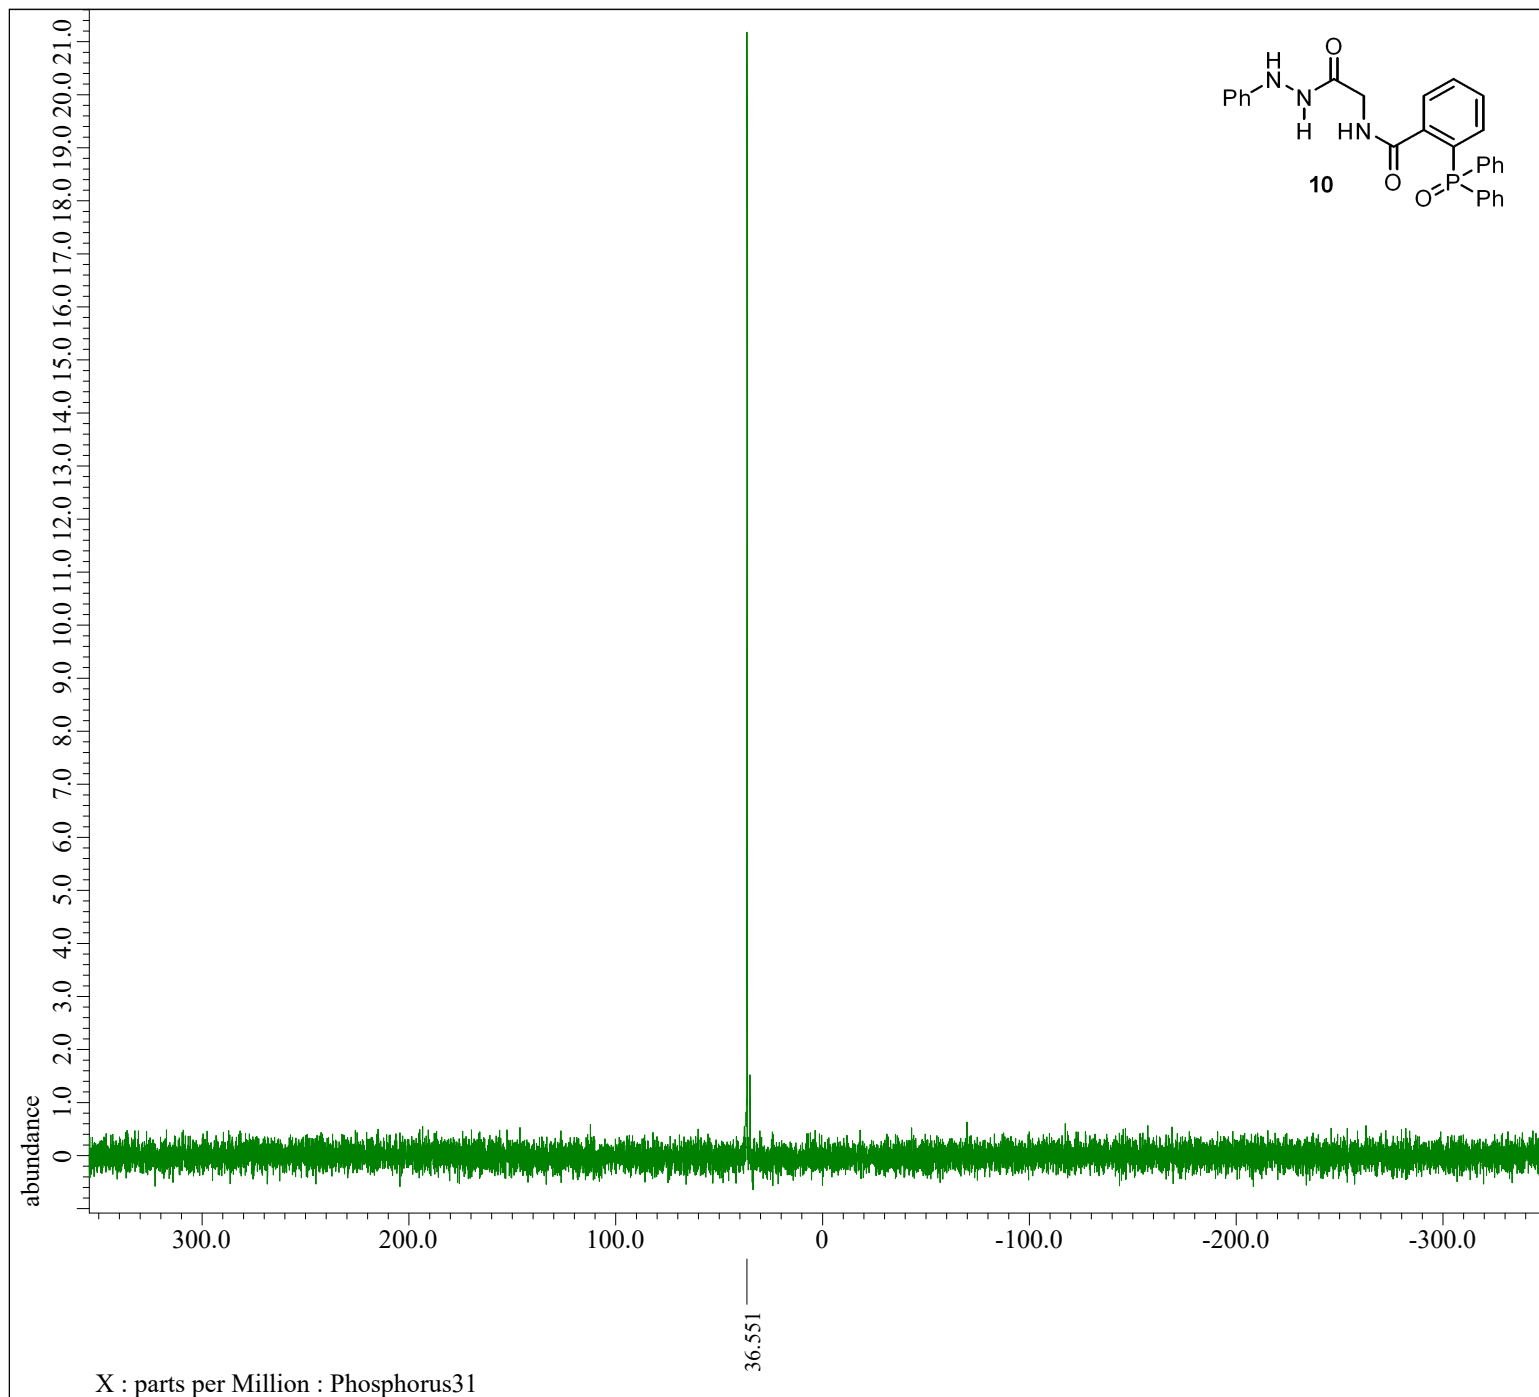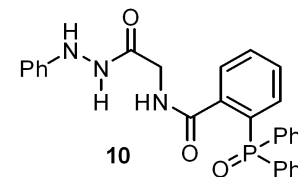

Filename = \_RA-1-84-1phosphorus-1-3.  
 Author = delta  
 Experiment = single\_pulse.ex2  
 Sample\_Id = S#564833  
 Solvent = CHLOROFORM-D  
 Actual\_Start\_Time = 21-FEB-2022 15:42:55  
 Revision\_Time = 11-MAY-2022 12:52:29

Data\_Format = 1D\_COMPLEX  
 Dim\_Size = 13107  
 X\_Domain = Phosph  
 Dim\_Title = Phosphorus31  
 Dim\_Units = [ppm]  
 Dimensions = X  
 Site = ECX 400P  
 Spectrometer = DELTA2\_NMR

Field\_Strength = 9.389766[T] (400[MHz])  
 X\_Acq\_Duration = 0.114688[s]  
 X\_Domain = 31P  
 X\_Freq = 161.83469309[MHz]  
 X\_Offset = 0[ppm]  
 X\_Points = 16384  
 X\_Prescans = 1  
 X\_Resolution = 8.71930804[Hz]  
 X\_Sweep = 142.85714286[kHz]  
 X\_Sweep\_Clippped = 114.28571429[kHz]  
 Irr\_Domain = Phosphorus31  
 Irr\_Freq = 161.83469309[MHz]  
 Irr\_Offset = 5[ppm]  
 Tri\_Domain = Phosphorus31  
 Tri\_Freq = 161.83469309[MHz]  
 Tri\_Offset = 5[ppm]  
 Clipped = FALSE  
 Scans = 8  
 Total\_Scans = 8

Relaxation\_Delay = 5[s]  
 Recvr\_Gain = 56  
 Temp\_Get = 21.5[dC]  
 X\_90\_Width = 15.2[us]  
 X\_Acq\_Time = 0.114688[s]  
 X\_Angle = 45[deg]  
 X\_Atn = 8[dB]  
 X\_Pulse = 7.6[us]  
 Irr\_Mode = Off  
 Tri\_Mode = Off  
 Automatic = TRUE  
 Dante\_Presat = FALSE  
 Initial\_Wait = 1[s]  
 Repetition\_Time = 5.114688[s]

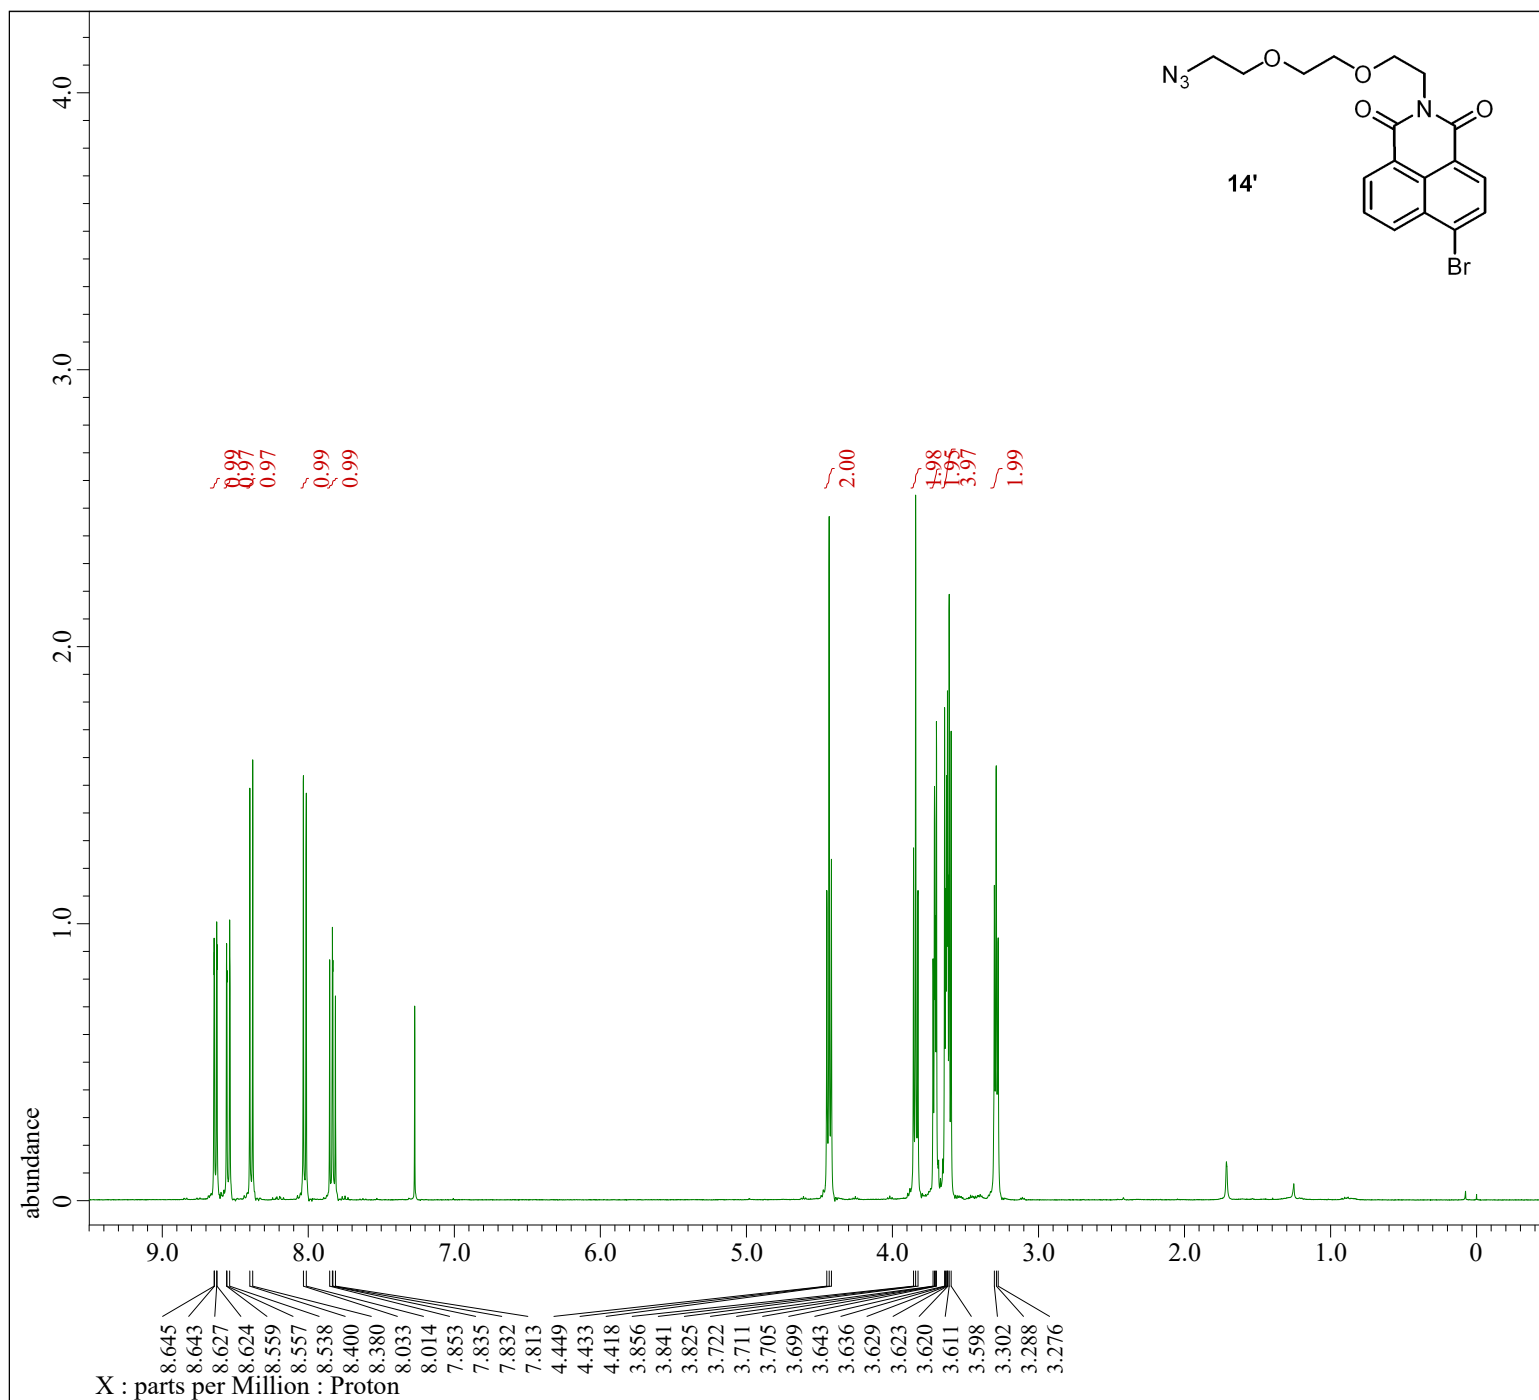

Filename = \_RA-1-113-1proton-1-6.jdf  
 Author = delta  
 Experiment = proton.jxp  
 Sample\_Id = S#544031  
 Solvent = CHLOROFORM-D  
 Actual\_Start\_Time = 24-JAN-2022 15:07:30  
 Revision\_Time = 5-JUL-2022 14:56:06

Comment = single\_pulse  
 Data\_Format = 1D\_COMPLEX  
 Dim\_Size = 13107  
 X\_Domain = Proton  
 Dim\_Title = Proton  
 Dim\_Units = [ppm]  
 Dimensions = X  
 Site = ECX 400P  
 Spectrometer = DELTA2\_NMR

Field\_Strength = 9.389766[T] (400[MHz])  
 X\_Acq\_Duration = 2.18365952[s]  
 X\_Domain = 1H  
 X\_Freq = 399.78219838[MHz]  
 X\_Offset = 5[ppm]  
 X\_Points = 16384  
 X\_Prescans = 1  
 X\_Resolution = 0.45794685[Hz]  
 X\_Sweep = 7.5030012[kHz]  
 X\_Sweep\_Clippped = 6.00240096[kHz]  
 Irr\_Domain = Proton  
 Irr\_Freq = 399.78219838[MHz]  
 Irr\_Offset = 5[ppm]  
 Tri\_Domain = Proton  
 Tri\_Freq = 399.78219838[MHz]  
 Tri\_Offset = 5[ppm]  
 Clipped = FALSE  
 Scans = 8  
 Total\_Scans = 8

Relaxation\_Delay = 5[s]  
 Recvr\_Gain = 34  
 Temp\_Get = 21.1[dC]  
 X\_90\_Width = 11.5[us]  
 X\_Acq\_Time = 2.18365952[s]  
 X\_Angle = 45[deg]  
 X\_Atn = 1[dB]  
 X\_Pulse = 5.75[us]  
 Irr\_Mode = Off  
 Tri\_Mode = Off  
 Dante\_Presat = FALSE  
 Initial\_Wait = 1[s]  
 Repetition\_Time = 7.18365952[s]

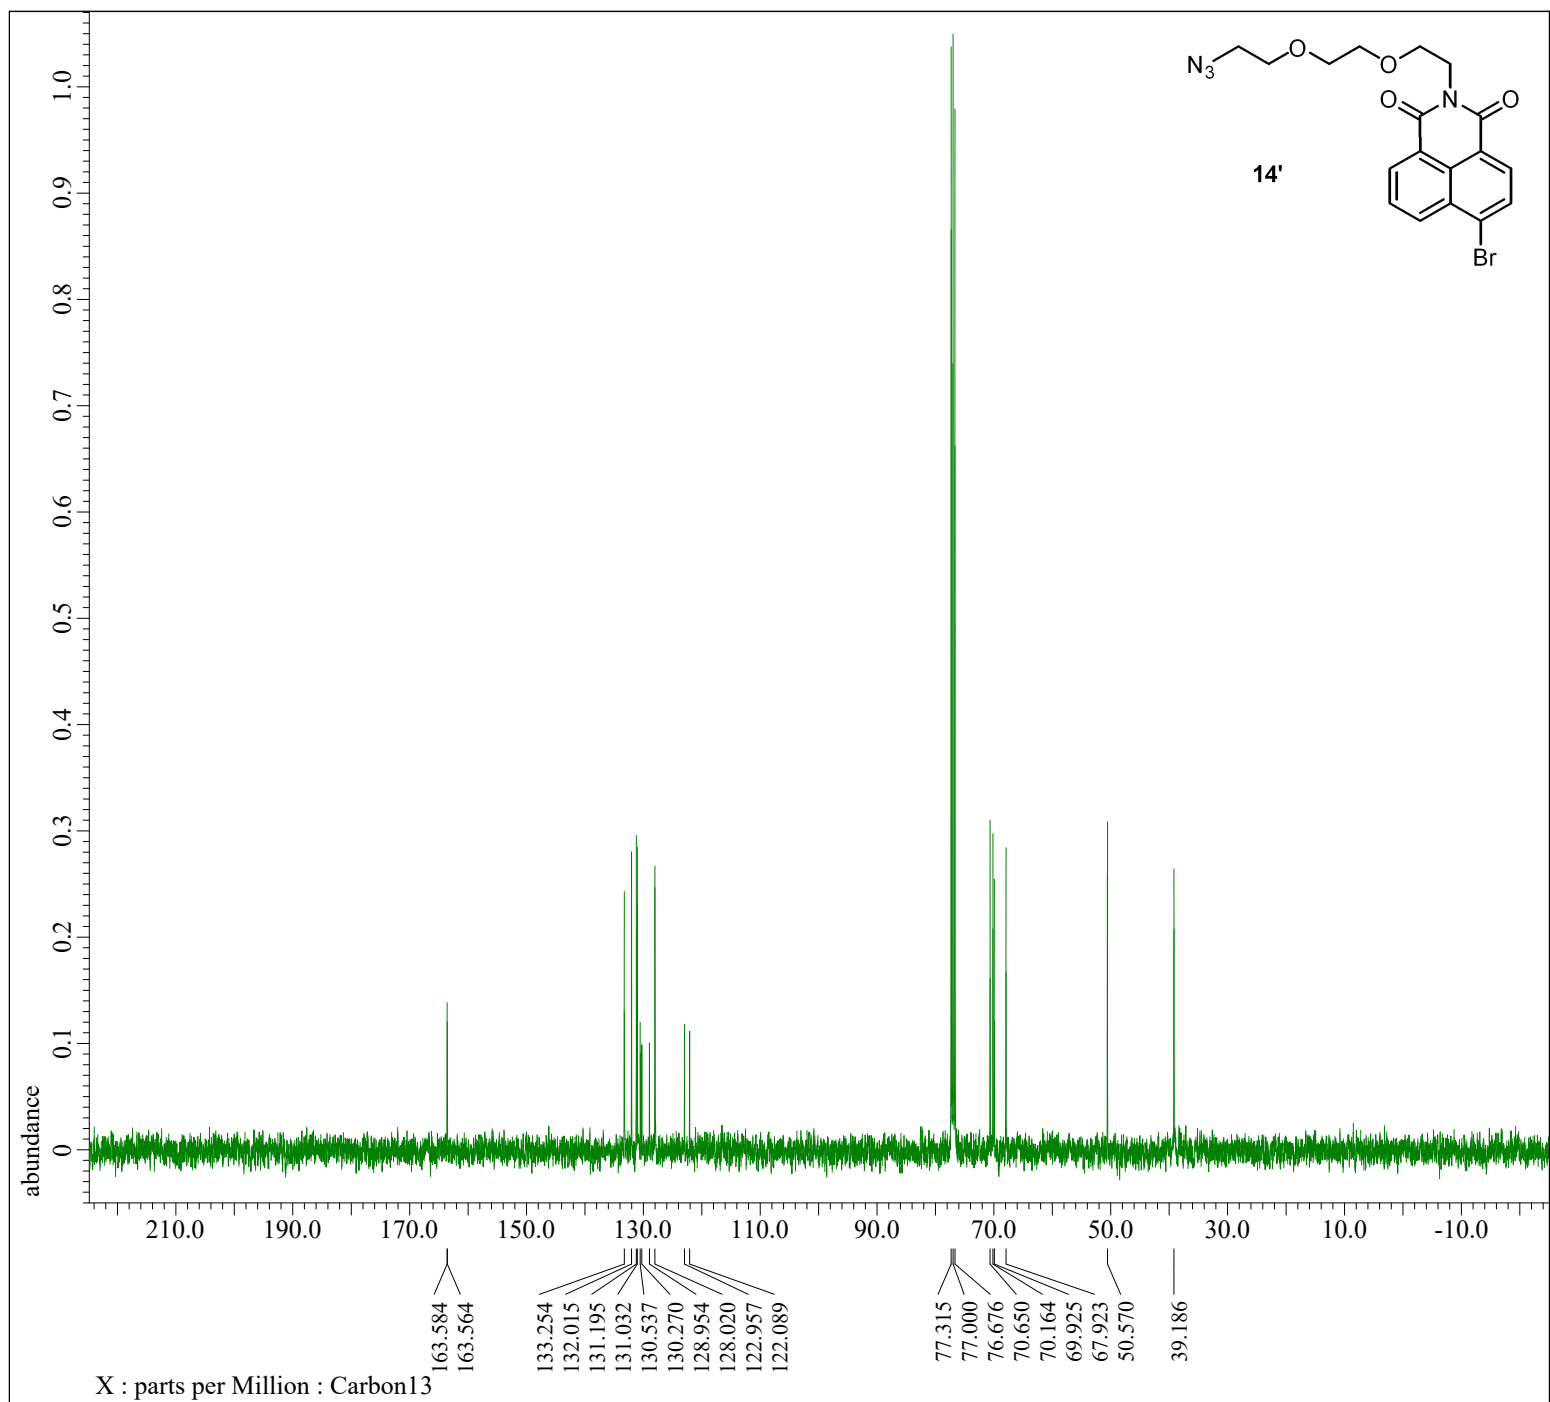

Filename = \_RA-1-113-1carbon-1-9.jdf  
 Author = delta  
 Experiment = carbon.jxp  
 Sample\_Id = S#546332  
 Solvent = CHLOROFORM-D  
 Actual\_Start\_Time = 24-JAN-2022 15:10:59  
 Revision\_Time = 24-JAN-2022 15:56:03

Comment = single pulse decoupled ga  
 Data\_Format = 1D\_COMPLEX  
 Dim\_Size = 26214  
 X\_Domain = Carbon  
 Dim\_Title = Carbon13  
 Dim\_Units = [ppm]  
 Dimensions = X  
 Site = ECX 400P  
 Spectrometer = DELTA2\_NMR

Field\_Strength = 9.389766[T] (400[MHz])  
 X\_Acq\_Duration = 1.04333312[s]  
 X\_Domain = 13C  
 X\_Freq = 100.52530333[MHz]  
 X\_Offset = 100[ppm]  
 X\_Points = 32768  
 X\_Prescans = 4  
 X\_Resolution = 0.95846665[Hz]  
 X\_Sweep = 31.40703518[kHz]  
 X\_Sweep\_Clippped = 25.12562814[kHz]  
 Irr\_Domain = Proton  
 Irr\_Freq = 399.78219838[MHz]  
 Irr\_Offset = 5[ppm]  
 Clipped = FALSE  
 Scans = 131  
 Total\_Scans = 131

Relaxation\_Delay = 2[s]  
 Recvr\_Gain = 58  
 Temp\_Get = 21.7[dC]  
 X\_90\_Width = 11[us]  
 X\_Acq\_Time = 1.04333312[s]  
 X\_Angle = 30[deg]  
 X\_Atn = 4[dB]  
 X\_Pulse = 3.66666667[us]  
 Irr\_Atn\_Dec = 21[dB]  
 Irr\_Atn\_Noe = 21[dB]  
 Irr\_Noise = WALTZ  
 Irr\_Pwidth = 0.115[ms]  
 Decoupling = TRUE  
 Initial\_Wait = 1[s]  
 Noe = TRUE  
 Noe\_Time = 2[s]  
 Repetition\_Time = 3.04333312[s]

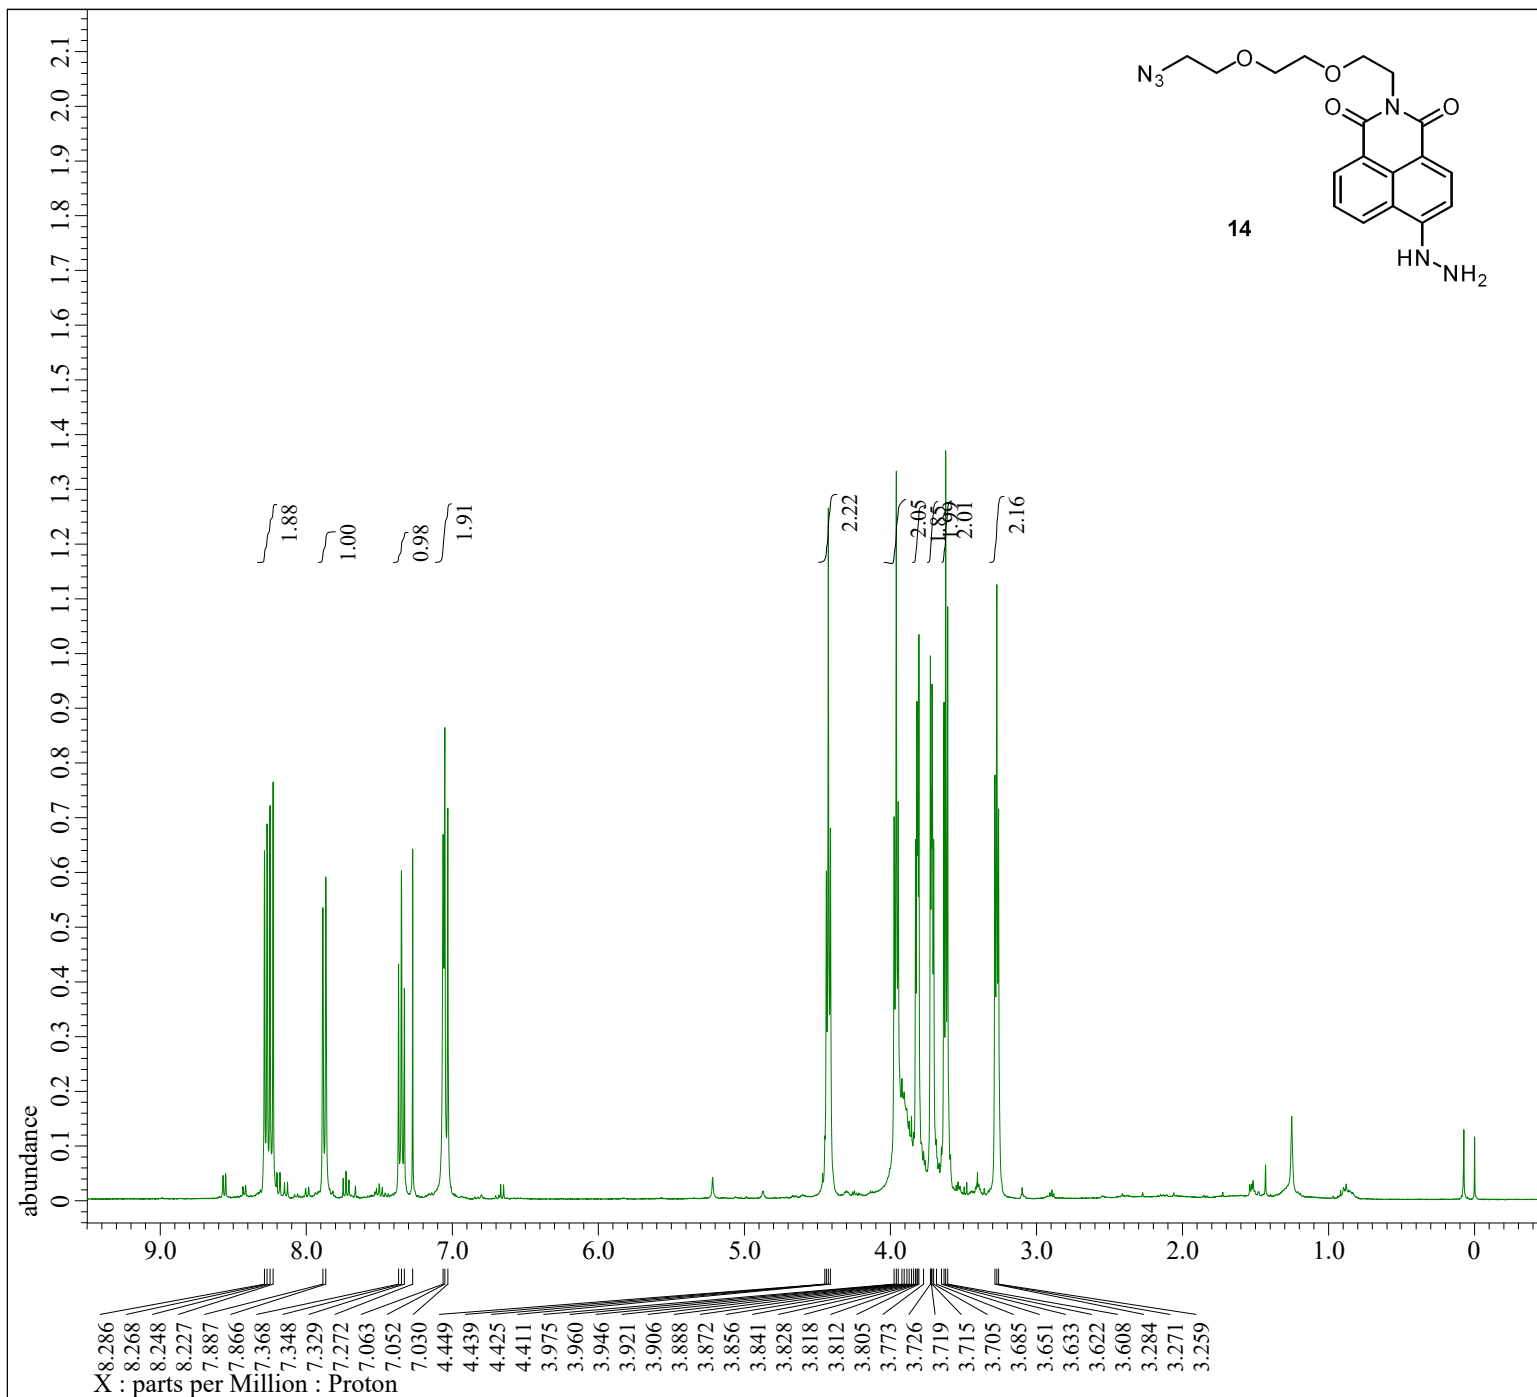

Filename = \_RA-1-114-1-2proton-1-7.j  
 Author = delta  
 Experiment = proton.jxp  
 Sample\_Id = S#599422  
 Solvent = CHLOROFORM-D  
 Actual\_Start\_Time = 26-JAN-2022 16:40:39  
 Revision\_Time = 5-JUL-2022 15:05:19

Comment = single\_pulse  
 Data\_Format = 1D\_COMPLEX  
 Dim\_Size = 13107  
 X\_Domain = Proton  
 Dim\_Title = Proton  
 Dim\_Units = [ppm]  
 Dimensions = X  
 Site = ECX 400P  
 Spectrometer = DELTA2\_NMR

Field\_Strength = 9.389766[T] (400[MHz])  
 X\_Acq\_Duration = 2.18365952[s]  
 X\_Domain = 1H  
 X\_Freq = 399.78219838[MHz]  
 X\_Offset = 5[ppm]  
 X\_Points = 16384  
 X\_Prescans = 8  
 X\_Resolution = 0.45794685[Hz]  
 X\_Sweep = 7.5030012[kHz]  
 X\_Sweep\_Clippped = 6.00240096[kHz]  
 Irr\_Domain = Proton  
 Irr\_Freq = 399.78219838[MHz]  
 Irr\_Offset = 5[ppm]  
 Tri\_Domain = Proton  
 Tri\_Freq = 399.78219838[MHz]  
 Tri\_Offset = 5[ppm]  
 Clipped = FALSE  
 Scans = 8  
 Total\_Scans = 8

Relaxation\_Delay = 5[s]  
 Recvr\_Gain = 34  
 Temp\_Get = 21.9[dC]  
 X\_90\_Width = 11.5[us]  
 X\_Acq\_Time = 2.18365952[s]  
 X\_Angle = 45[deg]  
 X\_Atn = 1[dB]  
 X\_Pulse = 5.75[us]  
 Irr\_Mode = Off  
 Tri\_Mode = Off  
 Dante\_Presat = FALSE  
 Initial\_Wait = 1[s]  
 Repetition\_Time = 7.18365952[s]

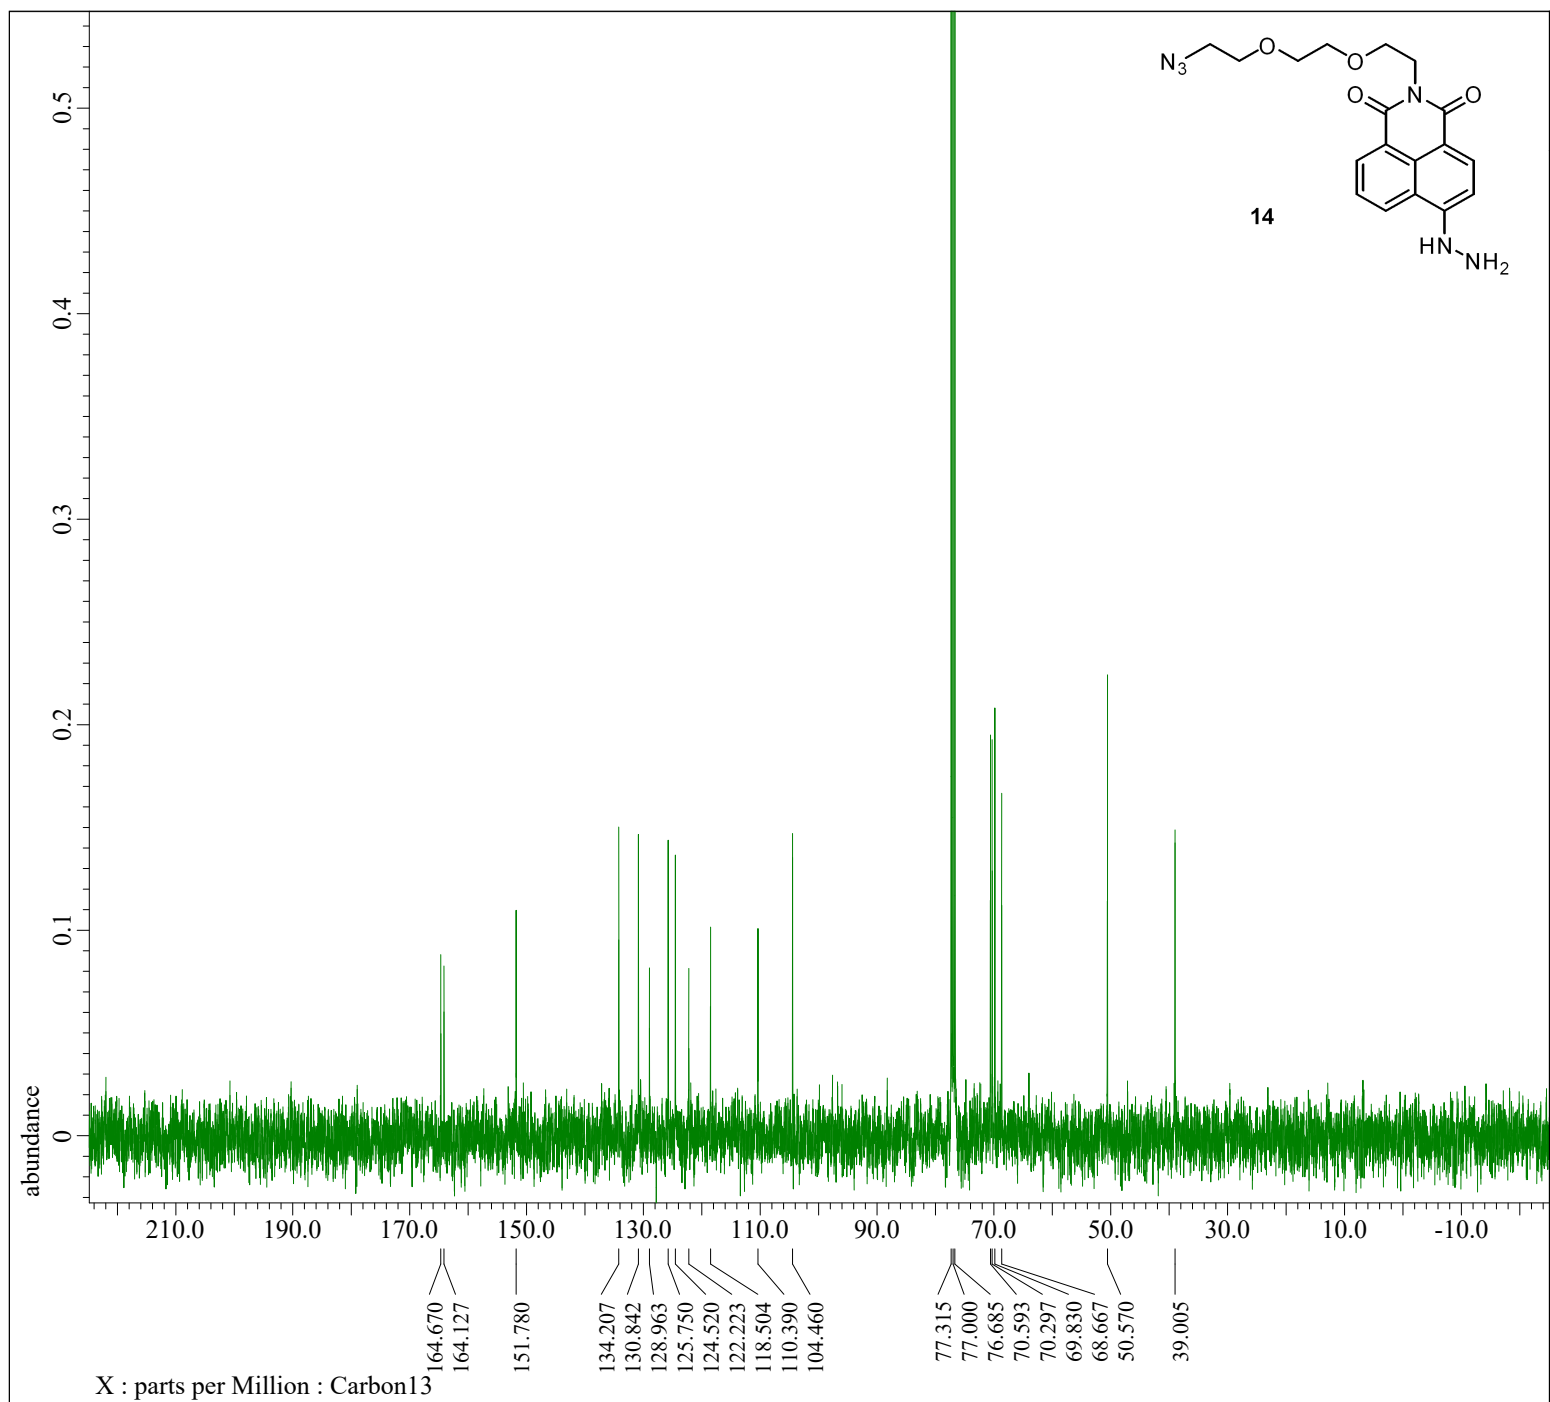

Filename = \_RA-1-114-1-2carbon-1-4.j  
 Author = delta  
 Experiment = carbon.jxp  
 Sample\_Id = S#602563  
 Solvent = CHLOROFORM-D  
 Actual\_Start\_Time = 26-JAN-2022 16:44:54  
 Revision\_Time = 26-JAN-2022 17:09:41

Comment = single pulse decoupled ga  
 Data\_Format = 1D\_COMPLEX  
 Dim\_Size = 26214  
 X\_Domain = Carbon  
 Dim\_Title = Carbon13  
 Dim\_Units = [ppm]  
 Dimensions = X  
 Site = ECX 400P  
 Spectrometer = DELTA2\_NMR

Field\_Strength = 9.389766[T] (400[MHz])  
 X\_Acq\_Duration = 1.04333312[s]  
 X\_Domain = 13C  
 X\_Freq = 100.52530333[MHz]  
 X\_Offset = 100[ppm]  
 X\_Points = 32768  
 X\_Prescans = 8  
 X\_Resolution = 0.95846665[Hz]  
 X\_Sweep = 31.40703518[kHz]  
 X\_Sweep\_Clippped = 25.12562814[kHz]  
 Irr\_Domain = Proton  
 Irr\_Freq = 399.78219838[MHz]  
 Irr\_Offset = 5[ppm]  
 Clipped = FALSE  
 Scans = 88  
 Total\_Scans = 88

Relaxation\_Delay = 2[s]  
 Recvr\_Gain = 58  
 Temp\_Get = 22[dC]  
 X\_90\_Width = 11[us]  
 X\_Acq\_Time = 1.04333312[s]  
 X\_Angle = 30[deg]  
 X\_Atn = 4[dB]  
 X\_Pulse = 3.66666667[us]  
 Irr\_Atn\_Dec = 21[dB]  
 Irr\_Atn\_Noe = 21[dB]  
 Irr\_Noise = WALTZ  
 Irr\_Pwidth = 0.115[ms]  
 Decoupling = TRUE  
 Initial\_Wait = 1[s]  
 Noe = TRUE  
 Noe\_Time = 2[s]  
 Repetition\_Time = 3.04333312[s]

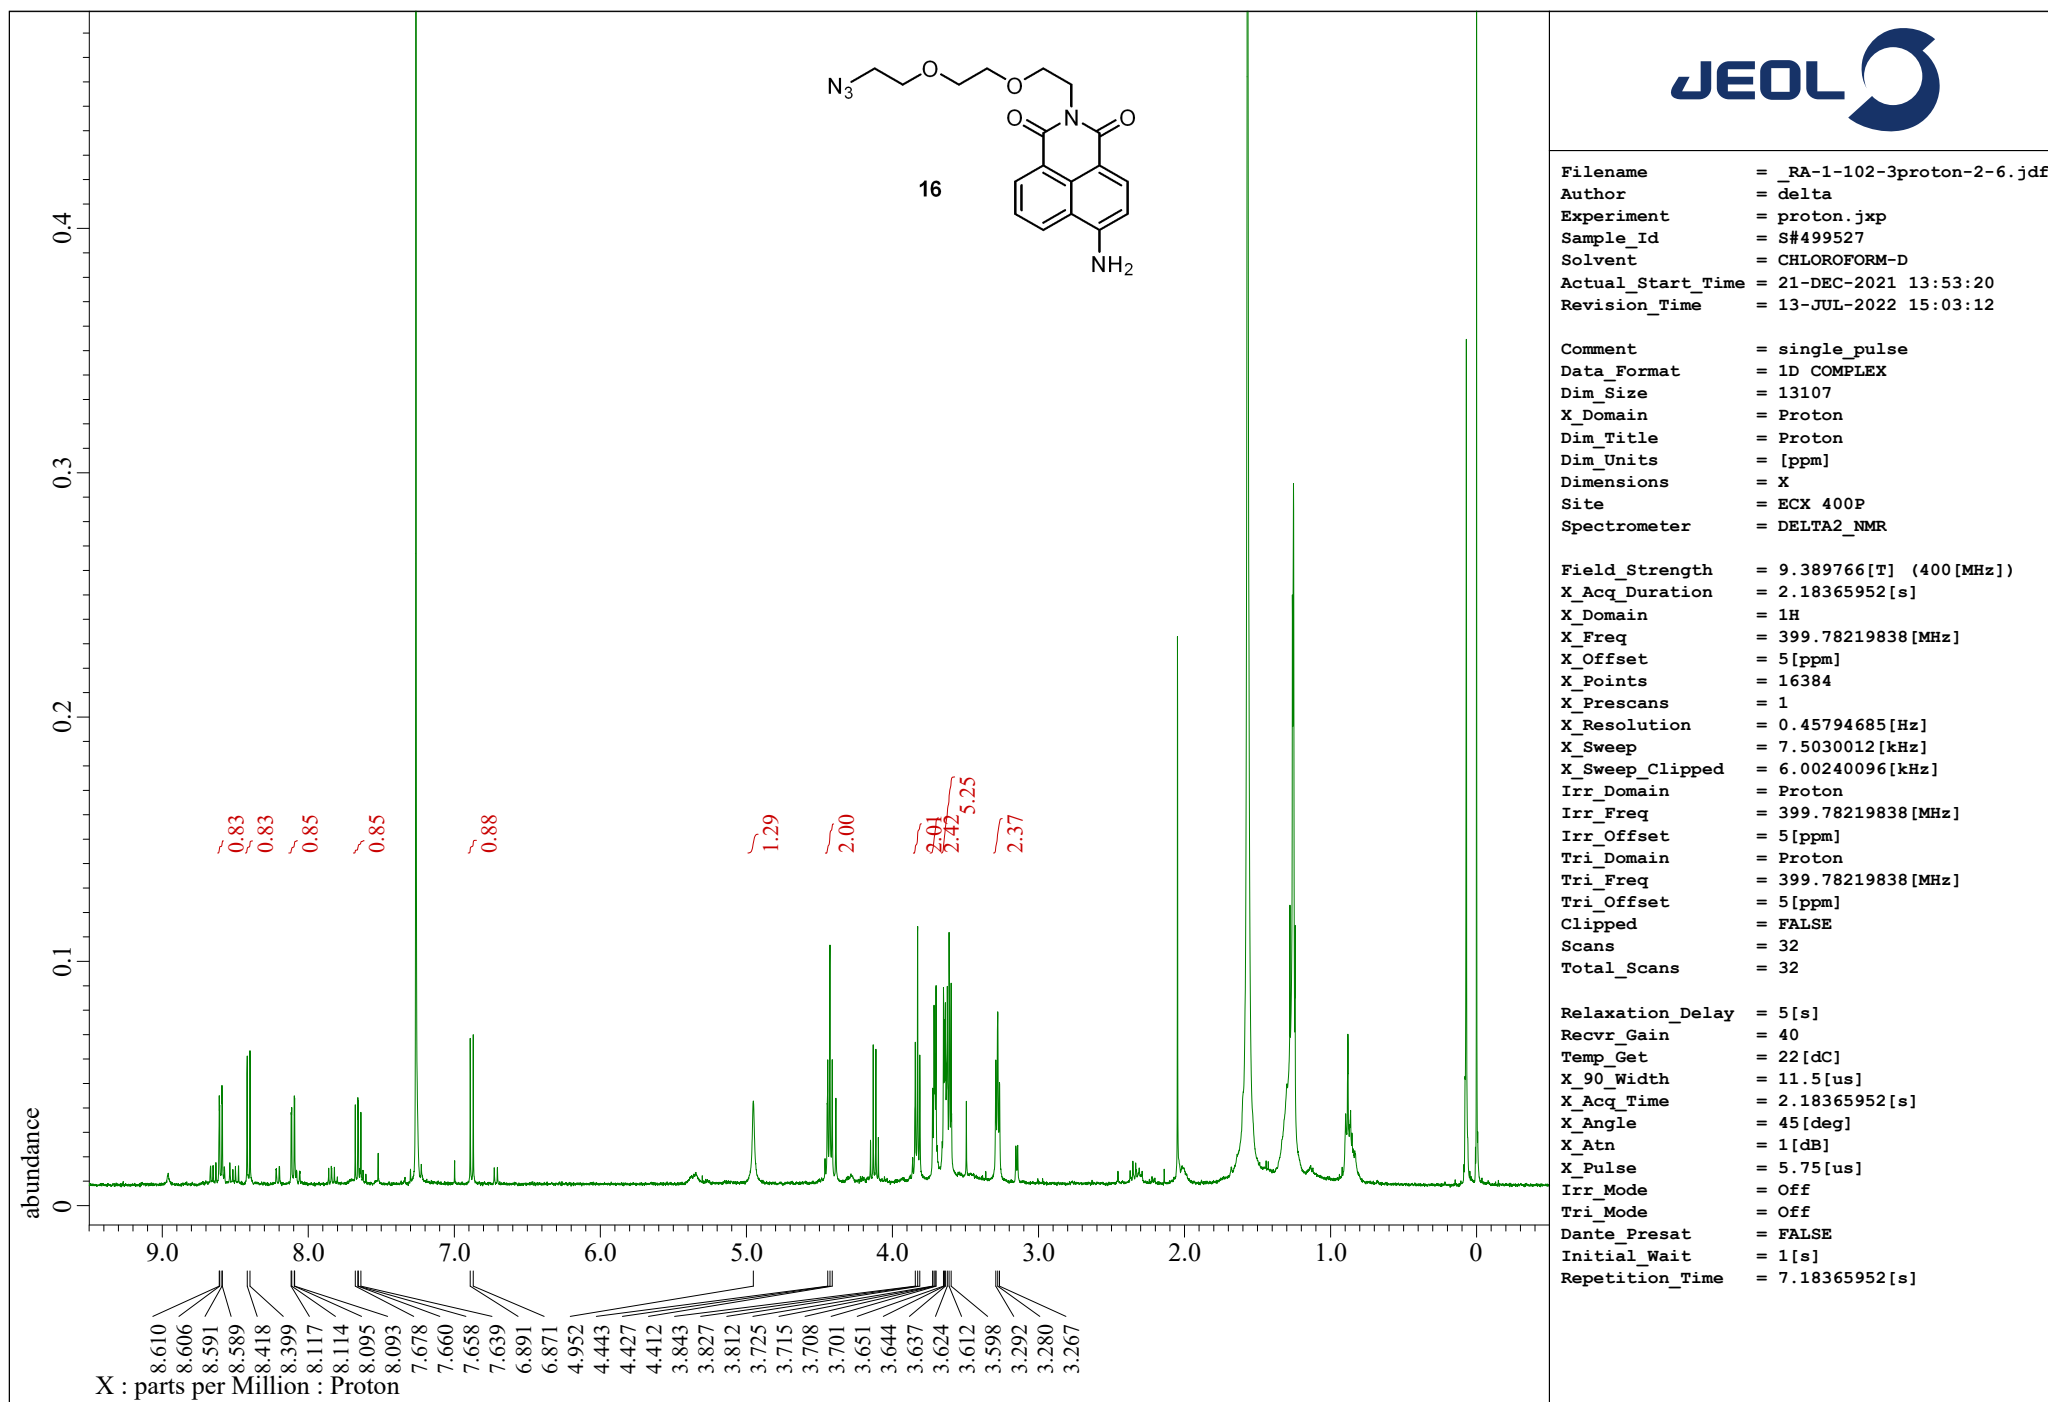



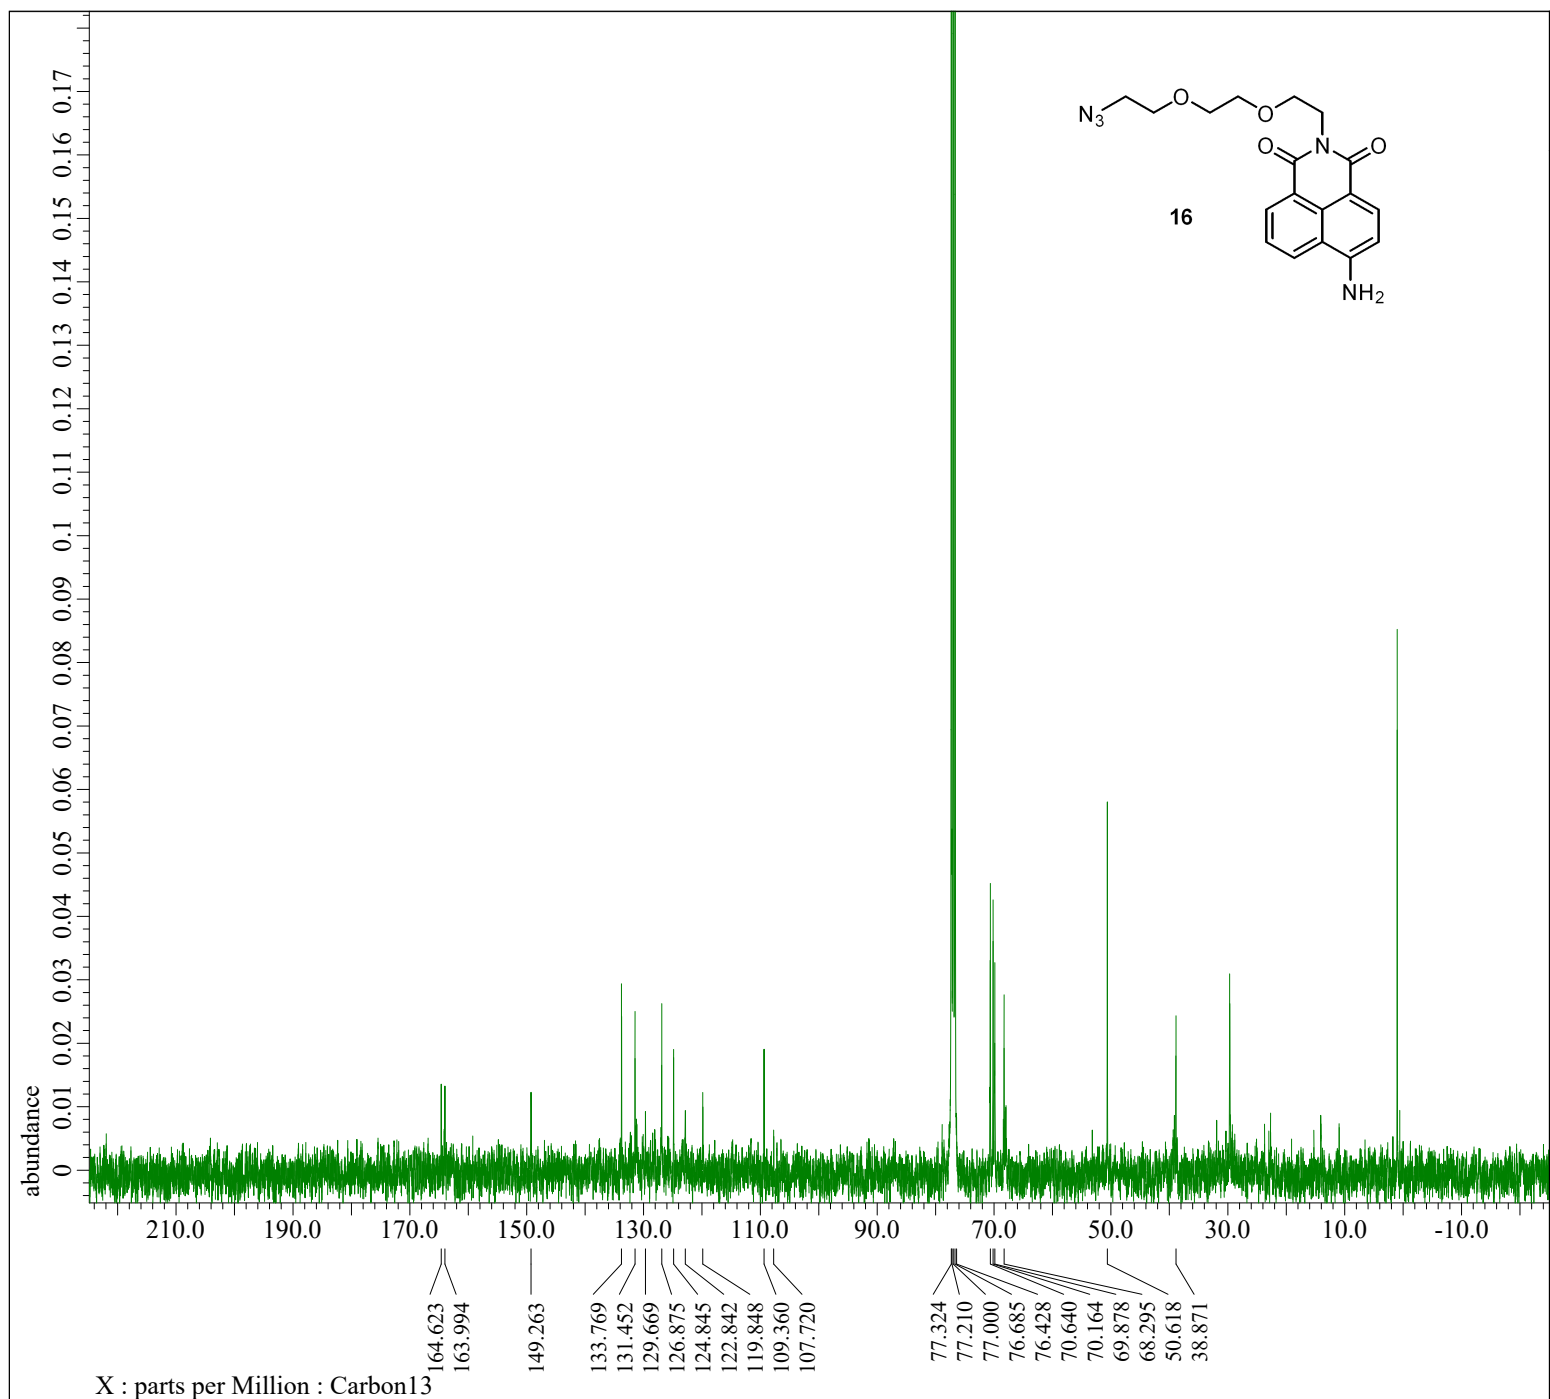

Filename = \_RA-1-128-1-2carbon-1-6.j  
 Author = delta  
 Experiment = carbon.jxp  
 Sample\_Id = S#472575  
 Solvent = CHLOROFORM-D  
 Actual\_Start\_Time = 11-MAY-2022 13:08:03  
 Revision\_Time = 11-MAY-2022 15:14:09

Comment = single pulse decoupled ga  
 Data\_Format = 1D COMPLEX  
 Dim\_Size = 26214  
 X\_Domain = Carbon  
 Dim\_Title = Carbon13  
 Dim\_Units = [ppm]  
 Dimensions = X  
 Site = ECX 400P  
 Spectrometer = DELTA2\_NMR

Field\_Strength = 9.389766[T] (400[MHz])  
 X\_Acq\_Duration = 1.04333312[s]  
 X\_Domain = 13C  
 X\_Freq = 100.52530333[MHz]  
 X\_Offset = 100[ppm]  
 X\_Points = 32768  
 X\_Prescans = 4  
 X\_Resolution = 0.95846665[Hz]  
 X\_Sweep = 31.40703518[kHz]  
 X\_Sweep\_Clippped = 25.12562814[kHz]  
 Irr\_Domain = Proton  
 Irr\_Freq = 399.78219838[MHz]  
 Irr\_Offset = 5[ppm]  
 Clipped = FALSE  
 Scans = 1685  
 Total\_Scans = 1685

Relaxation\_Delay = 2[s]  
 Recvr\_Gain = 58  
 Temp\_Get = 23[dC]  
 X\_90\_Width = 11[us]  
 X\_Acq\_Time = 1.04333312[s]  
 X\_Angle = 30[deg]  
 X\_Atn = 4[dB]  
 X\_Pulse = 3.66666667[us]  
 Irr\_Atn\_Dec = 21[dB]  
 Irr\_Atn\_Noe = 21[dB]  
 Irr\_Noise = WALTZ  
 Irr\_Pwidth = 0.115[ms]  
 Decoupling = TRUE  
 Initial\_Wait = 1[s]  
 Noe = TRUE  
 Noe\_Time = 2[s]  
 Repetition\_Time = 3.04333312[s]

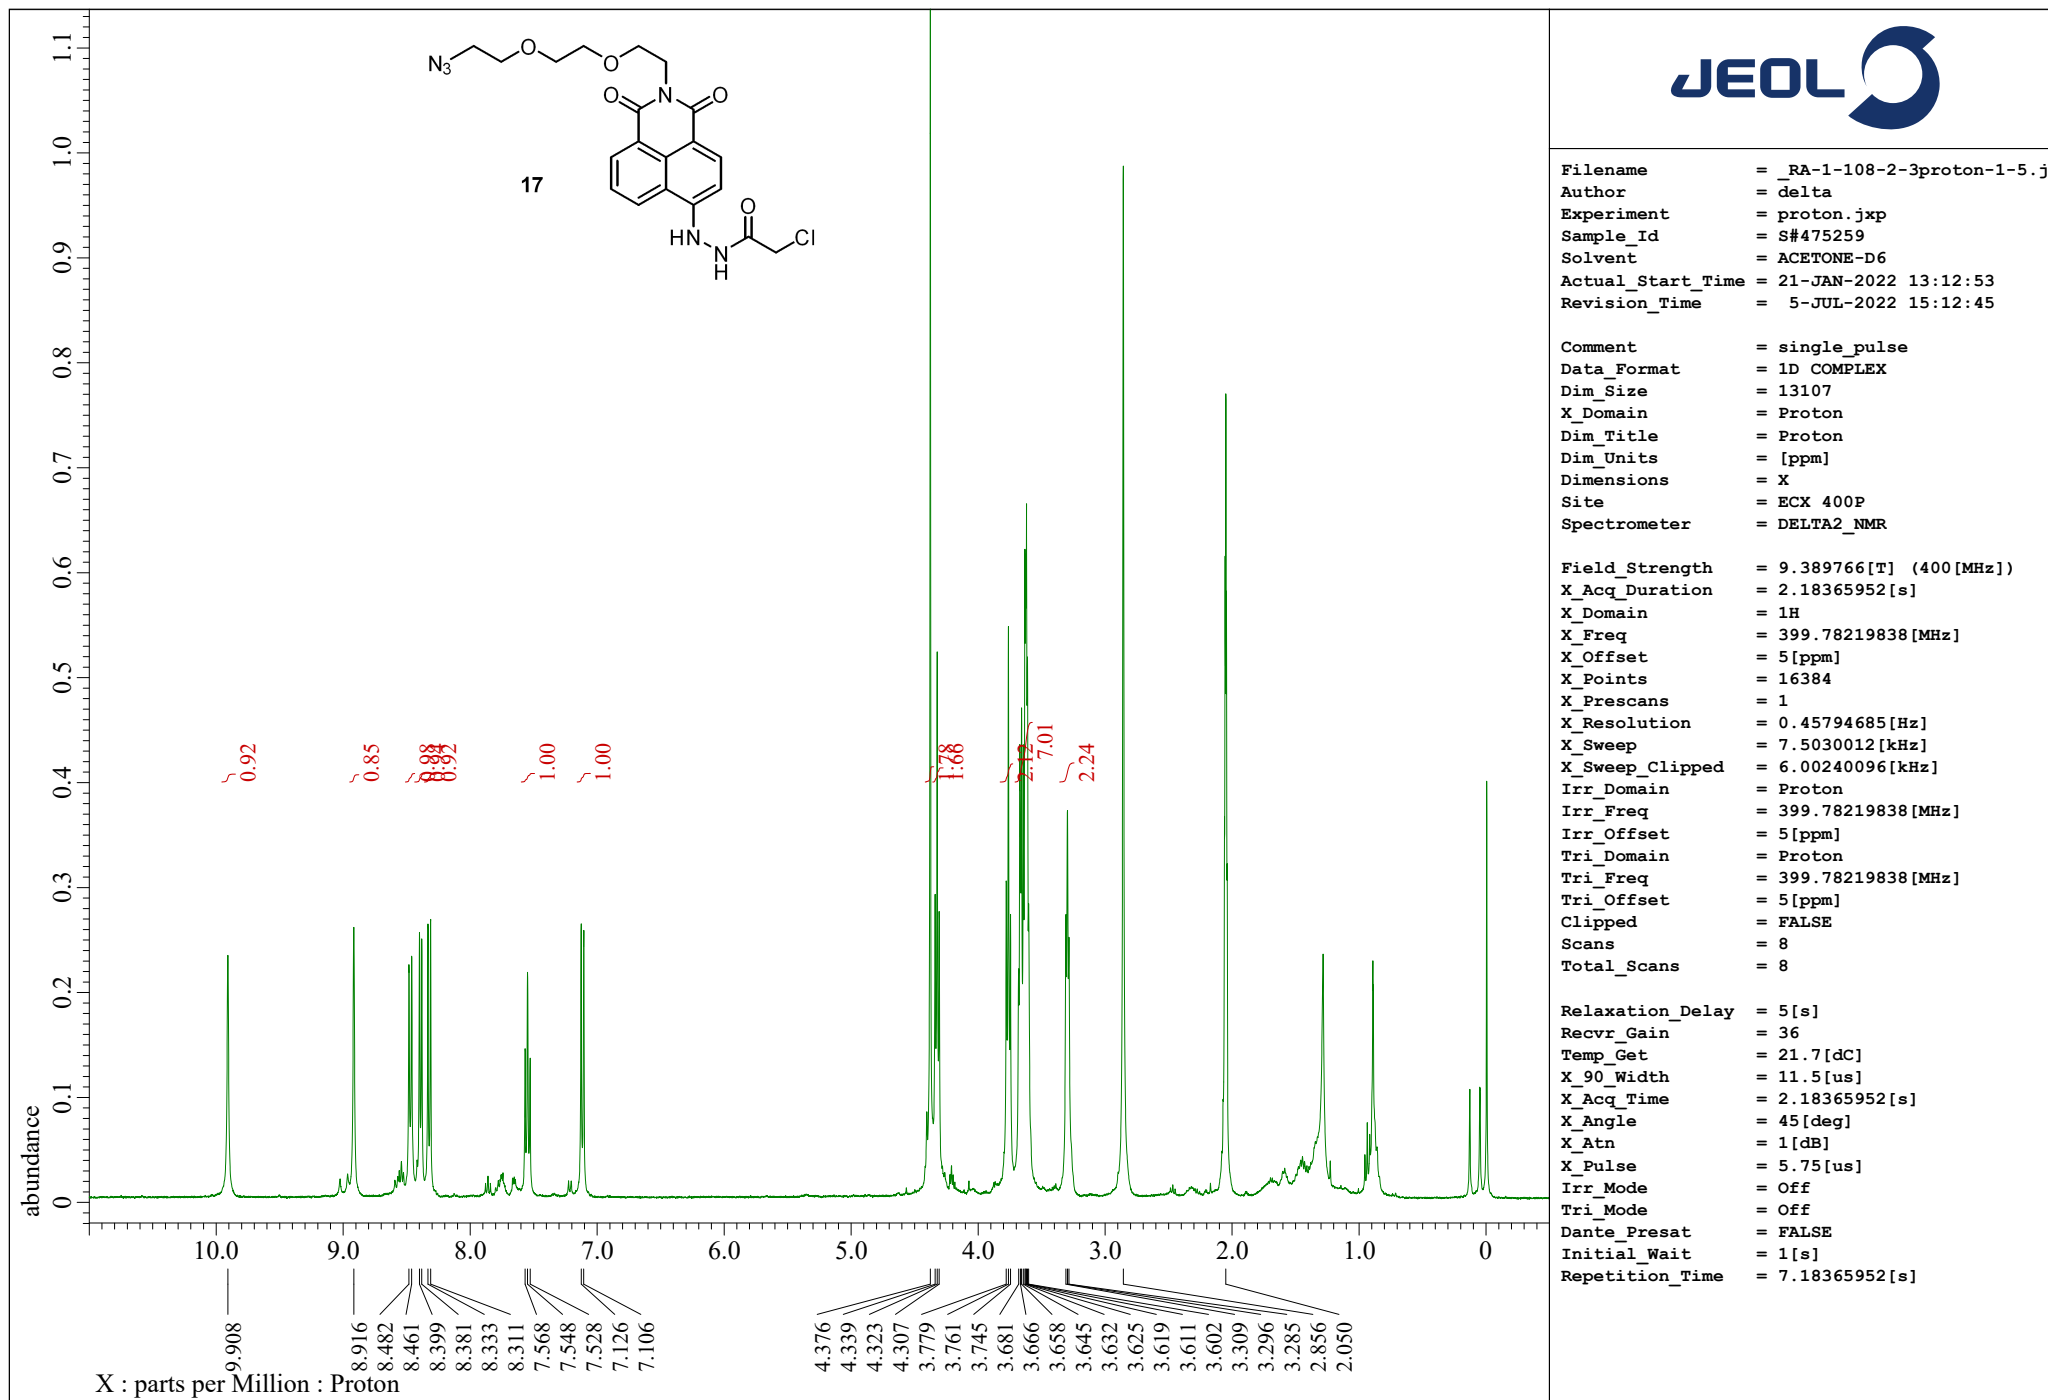

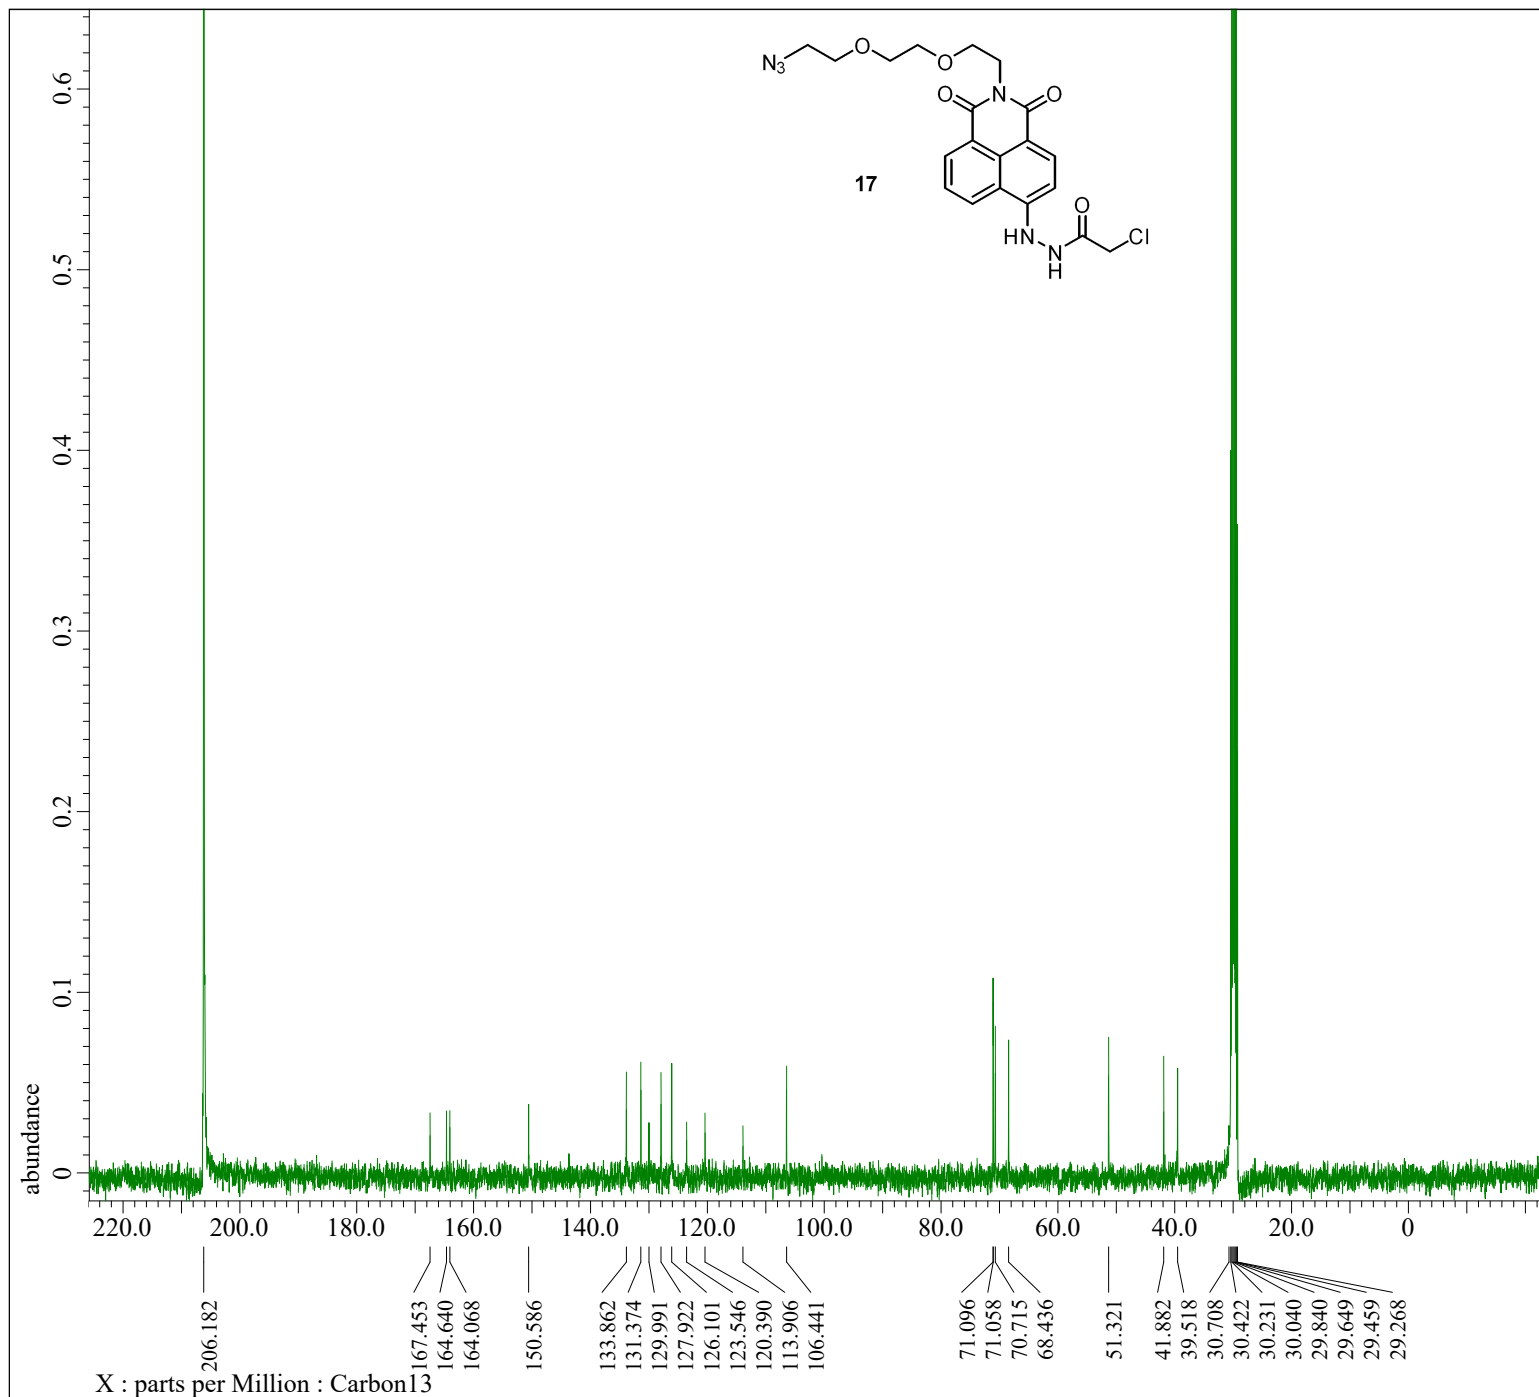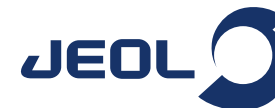

Filename = \_RA-1-108-2-3carbon-1-4.j  
 Author = delta  
 Experiment = carbon.jxp  
 Sample\_Id = S#478434  
 Solvent = ACETONE-D6  
 Actual\_Start\_Time = 21-JAN-2022 13:17:49  
 Revision\_Time = 21-JAN-2022 14:38:04

Comment = single pulse decoupled ga  
 Data\_Format = 1D COMPLEX  
 Dim\_Size = 26214  
 X\_Domain = Carbon  
 Dim\_Title = Carbon13  
 Dim\_Units = [ppm]  
 Dimensions = X  
 Site = ECX 400P  
 Spectrometer = DELTA2\_NMR

Field\_Strength = 9.389766[T] (400[MHz])  
 X\_Acq\_Duration = 1.04333312[s]  
 X\_Domain = 13C  
 X\_Freq = 100.52530333[MHz]  
 X\_Offset = 100[ppm]  
 X\_Points = 32768  
 X\_Prescans = 4  
 X\_Resolution = 0.95846665[Hz]  
 X\_Sweep = 31.40703518[kHz]  
 X\_Sweep\_Clippped = 25.12562814[kHz]  
 Irr\_Domain = Proton  
 Irr\_Freq = 399.78219838[MHz]  
 Irr\_Offset = 5[ppm]  
 Clipped = FALSE  
 Scans = 550  
 Total\_Scans = 550

Relaxation\_Delay = 2[s]  
 Recvr\_Gain = 58  
 Temp\_Get = 21.9[dC]  
 X\_90\_Width = 11[us]  
 X\_Acq\_Time = 1.04333312[s]  
 X\_Angle = 30[deg]  
 X\_Atn = 4[dB]  
 X\_Pulse = 3.66666667[us]  
 Irr\_Atn\_Dec = 21[dB]  
 Irr\_Atn\_Noe = 21[dB]  
 Irr\_Noise = WALTZ  
 Irr\_Pwidth = 0.115[ms]  
 Decoupling = TRUE  
 Initial\_Wait = 1[s]  
 Noe = TRUE  
 Noe\_Time = 2[s]  
 Repetition\_Time = 3.04333312[s]

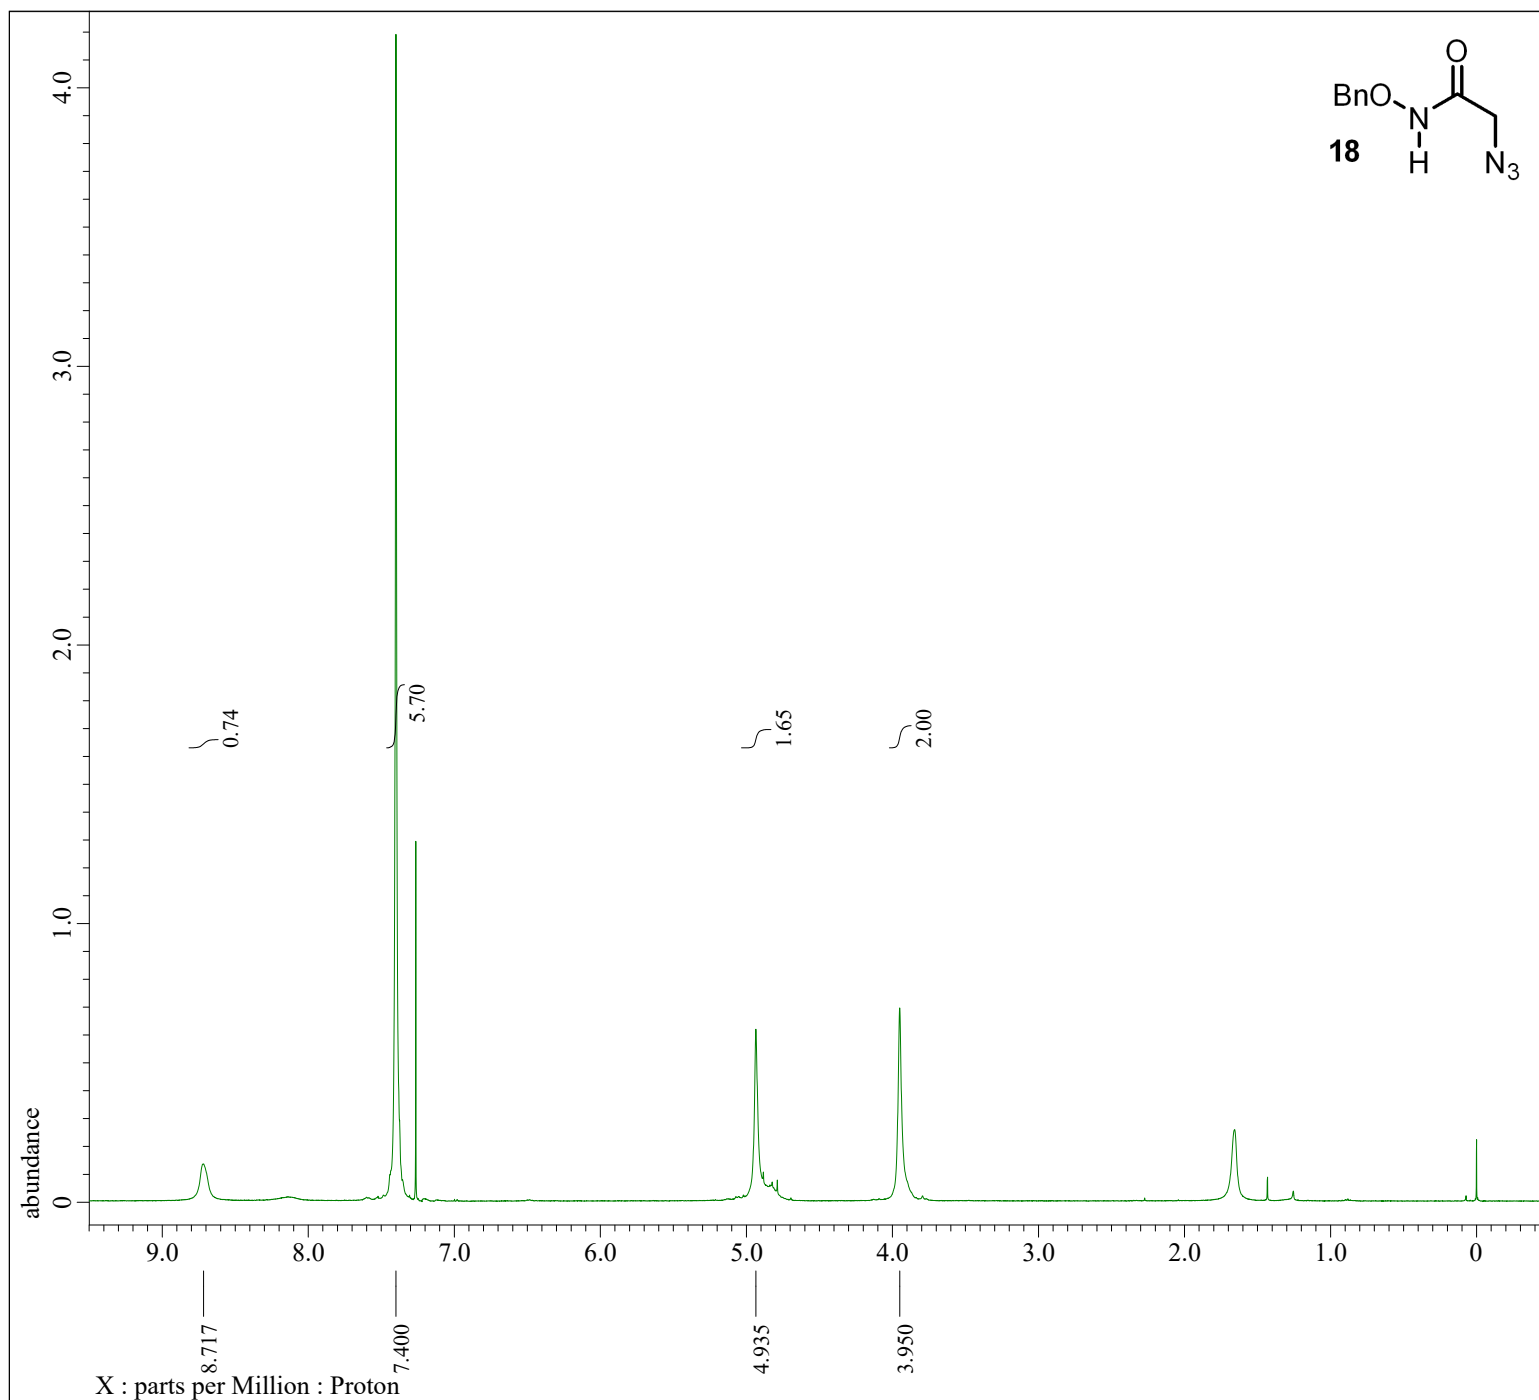

Filename = \_RA-1-10-2proton-1-5.jdf  
 Author = delta  
 Experiment = proton.jxp  
 Sample\_Id = S#583447  
 Solvent = CHLOROFORM-D  
 Actual\_Start\_Time = 19-JUL-2022 16:13:11  
 Revision\_Time = 16-SEP-2022 17:55:57

Comment = single\_pulse  
 Data\_Format = 1D\_COMPLEX  
 Dim\_Size = 13107  
 X\_Domain = Proton  
 Dim\_Title = Proton  
 Dim\_Units = [ppm]  
 Dimensions = X  
 Site = ECX 400P  
 Spectrometer = DELTA2\_NMR

Field\_Strength = 9.389766[T] (400[MHz])  
 X\_Acq\_Duration = 2.18365952[s]  
 X\_Domain = 1H  
 X\_Freq = 399.78219838[MHz]  
 X\_Offset = 5[ppm]  
 X\_Points = 16384  
 X\_Prescans = 1  
 X\_Resolution = 0.45794685[Hz]  
 X\_Sweep = 7.5030012[kHz]  
 X\_Sweep\_Clippped = 6.00240096[kHz]  
 Irr\_Domain = Proton  
 Irr\_Freq = 399.78219838[MHz]  
 Irr\_Offset = 5[ppm]  
 Tri\_Domain = Proton  
 Tri\_Freq = 399.78219838[MHz]  
 Tri\_Offset = 5[ppm]  
 Clipped = FALSE  
 Scans = 8  
 Total\_Scans = 8

Relaxation\_Delay = 5[s]  
 Recvr\_Gain = 36  
 Temp\_Get = 23.1[dC]  
 X\_90\_Width = 11.5[us]  
 X\_Acq\_Time = 2.18365952[s]  
 X\_Angle = 45[deg]  
 X\_Atn = 1[dB]  
 X\_Pulse = 5.75[us]  
 Irr\_Mode = Off  
 Tri\_Mode = Off  
 Dante\_Presat = FALSE  
 Initial\_Wait = 1[s]  
 Repetition\_Time = 7.18365952[s]

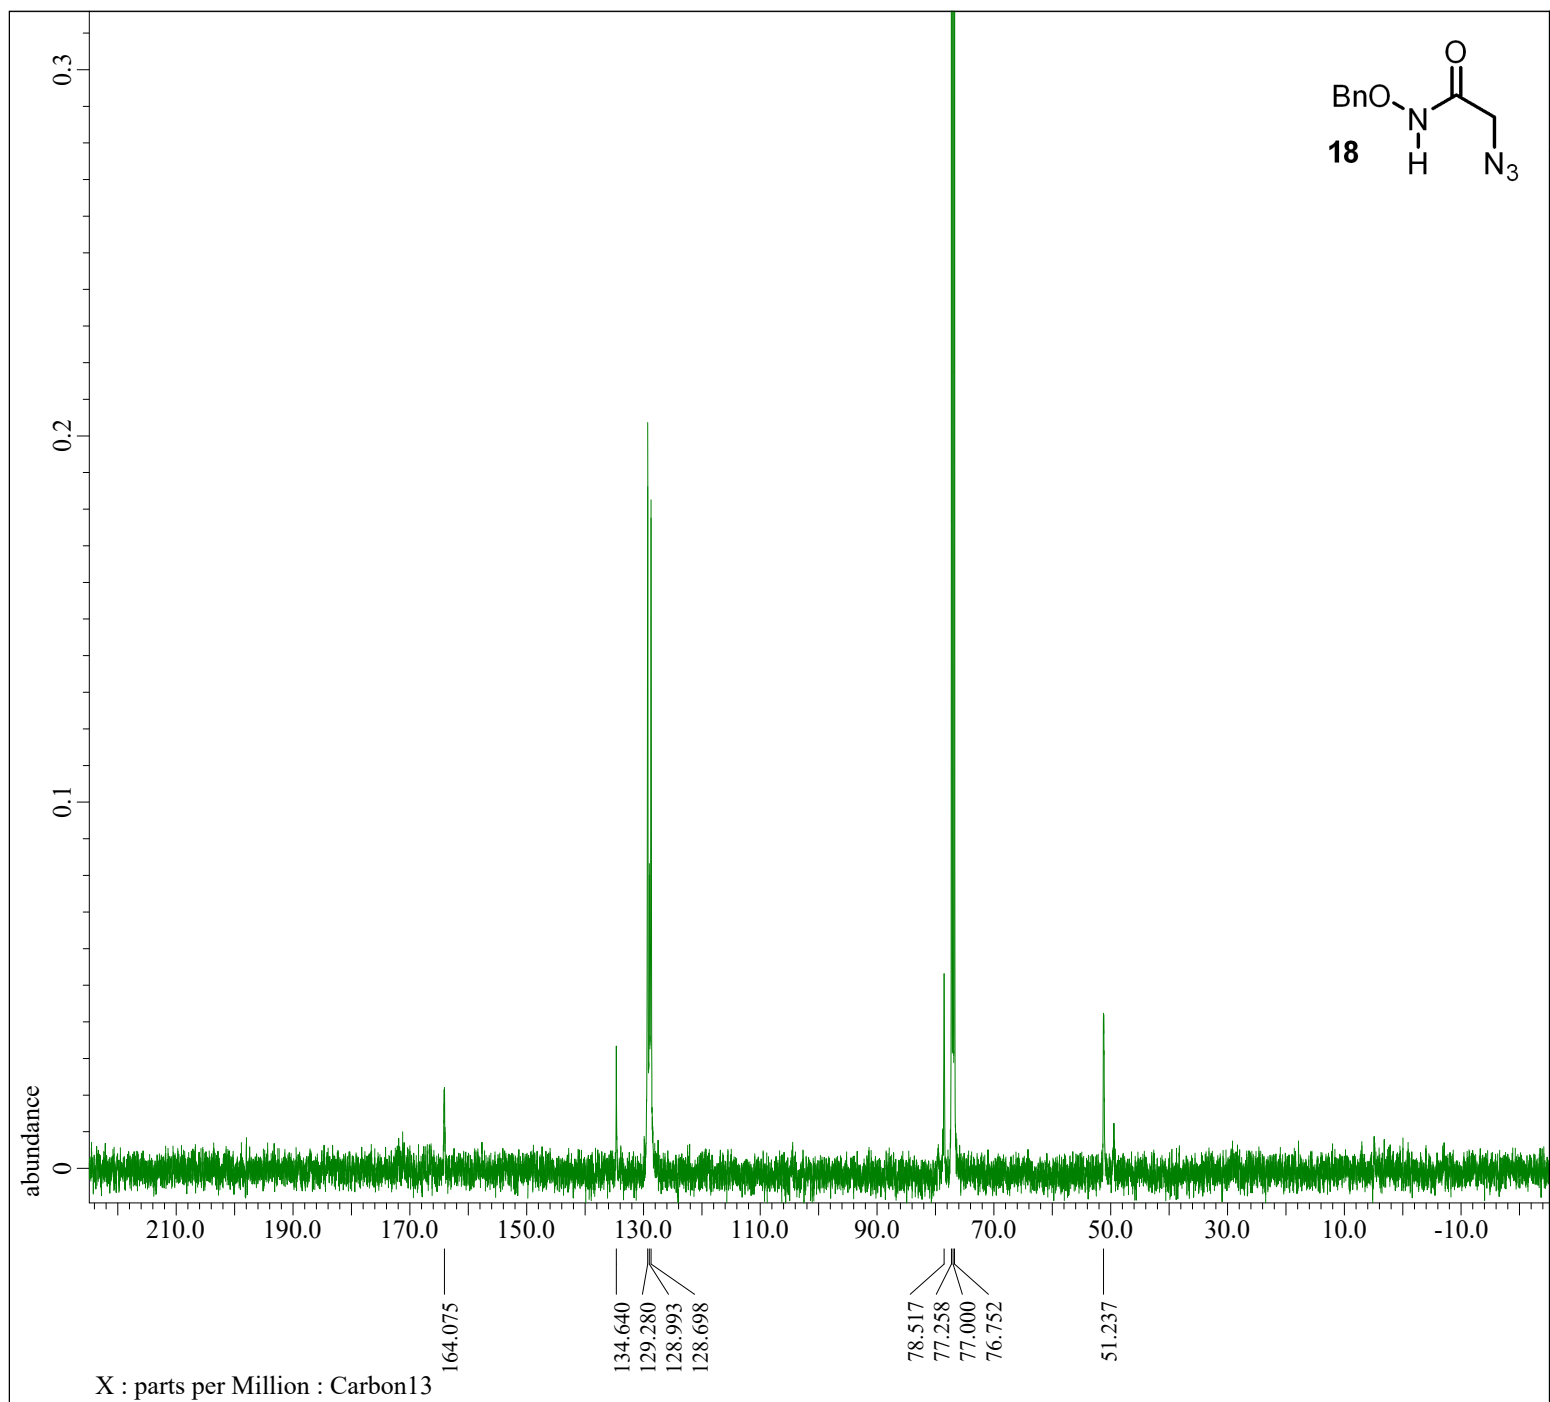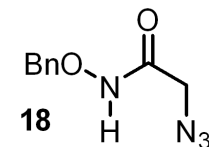

Filename = \_RA-1-10-2carbon-1-3.jdf  
 Author = delta  
 Experiment = carbon.jxp  
 Sample\_Id = S#578978  
 Solvent = CHLOROFORM-D  
 Actual\_Start\_Time = 20-JUL-2022 16:05:27  
 Revision\_Time = 20-JUL-2022 17:20:13

Comment = single pulse decoupled ga  
 Data\_Format = 1D COMPLEX  
 Dim\_Size = 26214  
 X\_Domain = Carbon  
 Dim\_Title = Carbon13  
 Dim\_Units = [ppm]  
 Dimensions = X  
 Site = JNM-ECA500II  
 Spectrometer = DELTA2\_NMR

Field\_Strength = 11.7473579[T] (500[MHz])  
 X\_Acq\_Duration = 0.83361792[s]  
 X\_Domain = 13C  
 X\_Freq = 125.76529768[MHz]  
 X\_Offset = 100[ppm]  
 X\_Points = 32768  
 X\_Prescans = 4  
 X\_Resolution = 1.19959034[Hz]  
 X\_Sweep = 39.3081761[kHz]  
 X\_Sweep\_Clippped = 31.44654088[kHz]  
 Irr\_Domain = Proton  
 Irr\_Freq = 500.15991521[MHz]  
 Irr\_Offset = 5.0[ppm]  
 Clipped = FALSE  
 Scans = 1024  
 Total\_Scans = 1024

Relaxation\_Delay = 2[s]  
 Recvr\_Gain = 58  
 Temp\_Get = 21.9[dC]  
 X\_90\_Width = 10.9[us]  
 X\_Acq\_Time = 0.83361792[s]  
 X\_Angle = 30[deg]  
 X\_Atn = 8.2[dB]  
 X\_Pulse = 3.63333333[us]  
 Irr\_Atn\_Dec = 22.955[dB]  
 Irr\_Atn\_Noe = 22.955[dB]  
 Irr\_Noise = WALTZ  
 Irr\_Pwidth = 75[us]  
 Decoupling = TRUE  
 Initial\_Wait = 1[s]  
 Noe = TRUE  
 Noe\_Time = 2[s]  
 Repetition\_Time = 2.83361792[s]

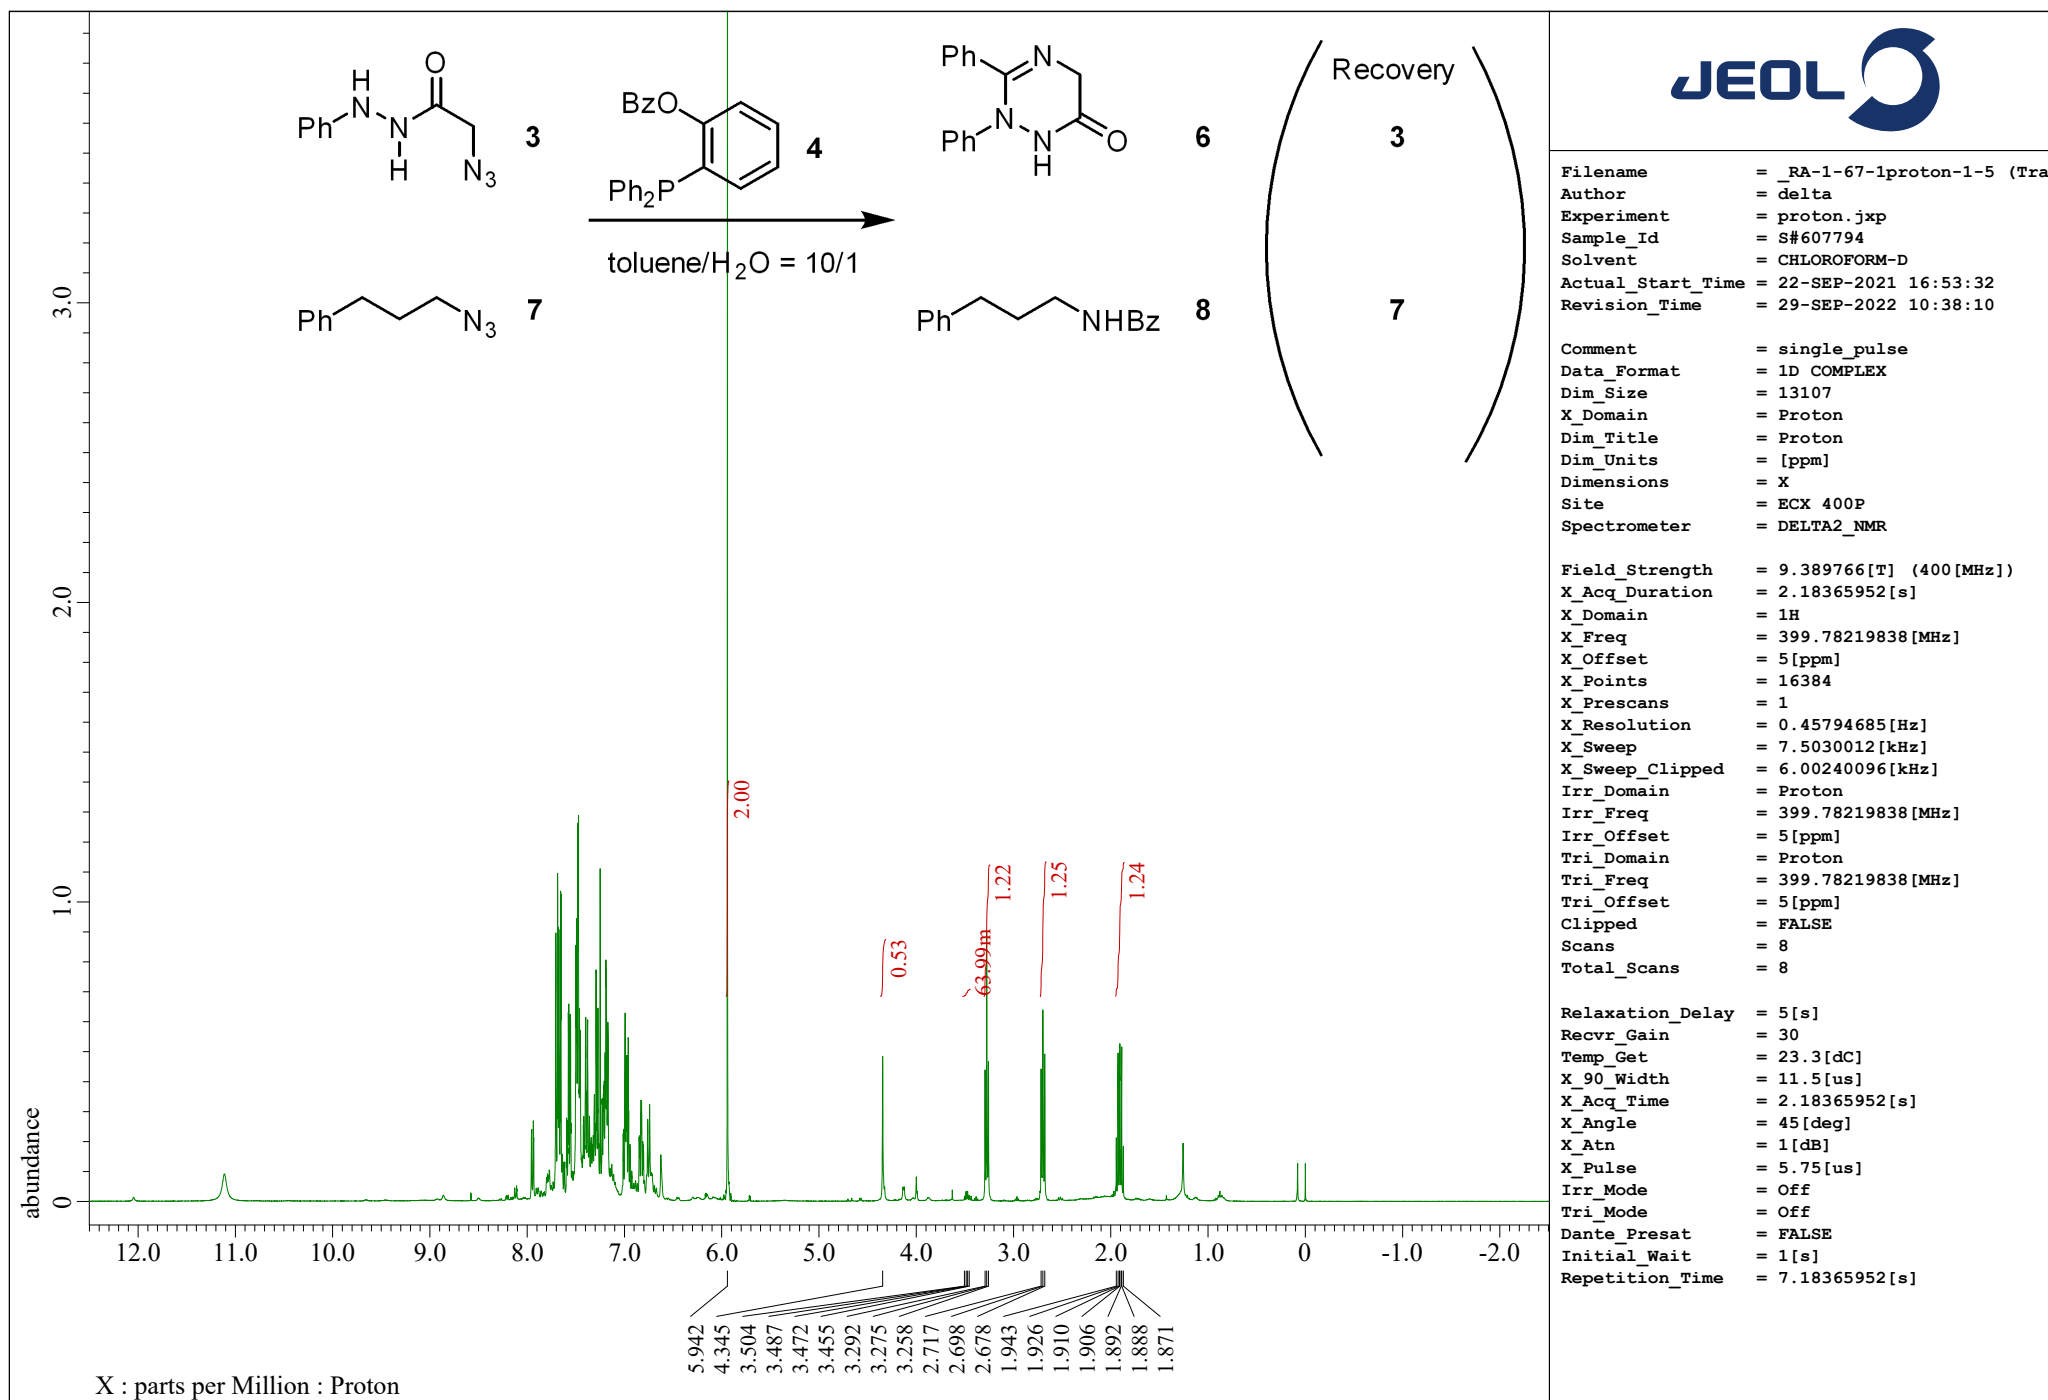

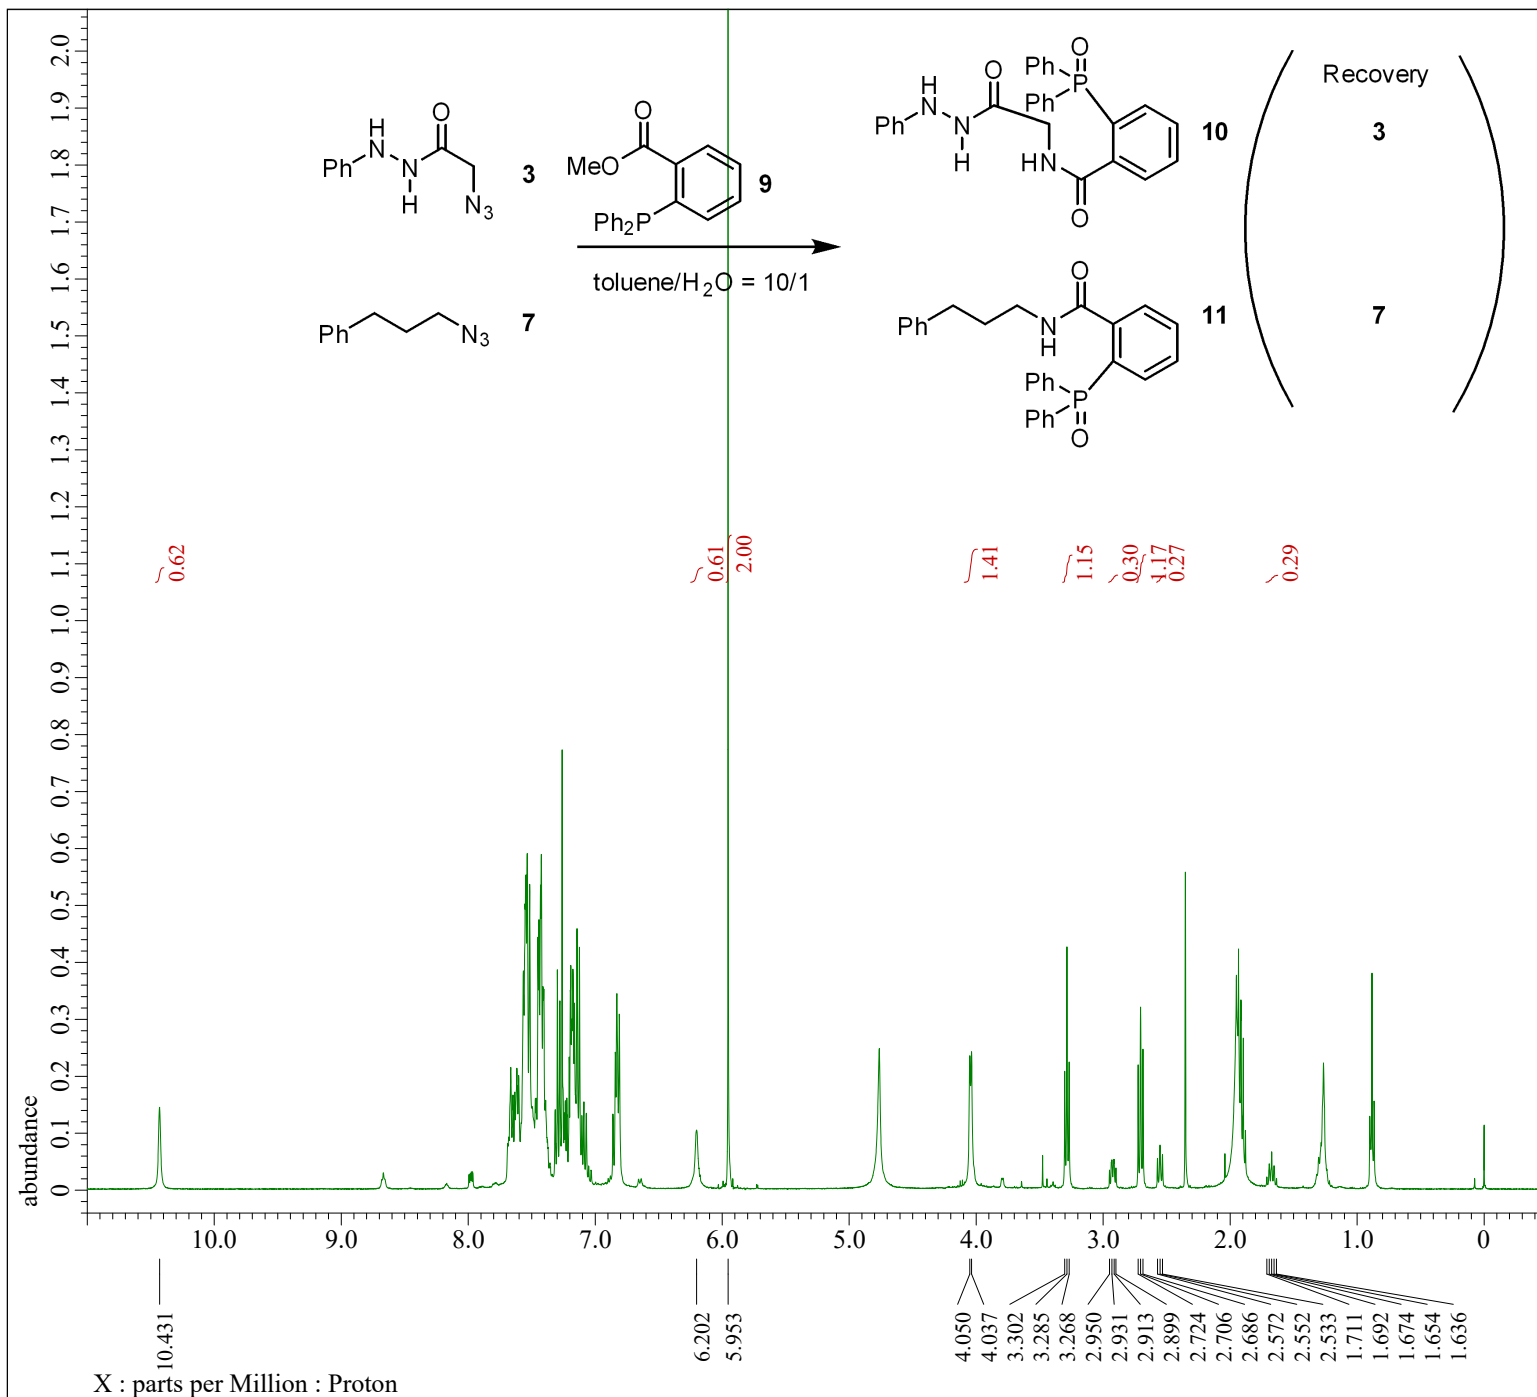

Filename = \_RA-1-91-lproton-1-4 (Sta  
 Author = delta  
 Experiment = proton.jxp  
 Sample\_Id = S#610475  
 Solvent = CHLOROFORM-D  
 Actual\_Start\_Time = 29-OCT-2021 16:58:29  
 Revision\_Time = 2-SEP-2022 18:21:34

Comment = single\_pulse  
 Data\_Format = 1D\_COMPLEX  
 Dim\_Size = 13107  
 X\_Domain = Proton  
 Dim\_Title = Proton  
 Dim\_Units = [ppm]  
 Dimensions = X  
 Site = ECX 400P  
 Spectrometer = DELTA2\_NMR

Field\_Strength = 9.389766[T] (400[MHz])  
 X\_Acq\_Duration = 2.18365952[s]  
 X\_Domain = 1H  
 X\_Freq = 399.78219838[MHz]  
 X\_Offset = 5[ppm]  
 X\_Points = 16384  
 X\_Prescans = 1  
 X\_Resolution = 0.45794685[Hz]  
 X\_Sweep = 7.5030012[kHz]  
 X\_Sweep\_Clippped = 6.00240096[kHz]  
 Irr\_Domain = Proton  
 Irr\_Freq = 399.78219838[MHz]  
 Irr\_Offset = 5[ppm]  
 Tri\_Domain = Proton  
 Tri\_Freq = 399.78219838[MHz]  
 Tri\_Offset = 5[ppm]  
 Clipped = FALSE  
 Scans = 8  
 Total\_Scans = 8

Relaxation\_Delay = 5[s]  
 Recvr\_Gain = 34  
 Temp\_Get = 22.5[dC]  
 X\_90\_Width = 11.5[us]  
 X\_Acq\_Time = 2.18365952[s]  
 X\_Angle = 45[deg]  
 X\_Atn = 1[dB]  
 X\_Pulse = 5.75[us]  
 Irr\_Mode = Off  
 Tri\_Mode = Off  
 Dante\_Presat = FALSE  
 Initial\_Wait = 1[s]  
 Repetition\_Time = 7.18365952[s]
